# Reannotation of the ribonucleotide reductase in a cyanophage reveals life history strategies within the viroplankton

1 Amelia O. Harrison<sup>1</sup>, Ryan M. Moore<sup>2</sup>, Shawn W. Polson<sup>2</sup>, K. Eric Wommack<sup>1\*</sup>

2 <sup>1</sup>School of Marine Science and Policy, University of Delaware, Newark, DE, USA

3 <sup>2</sup>Center for Bioinformatics and Computational Biology, University of Delaware, Newark, DE, USA

4 \* **Correspondence:**

5 K. Eric Wommack

6 wommack@dbi.udel.edu

7 **Keywords:** cyanophage<sup>1</sup>, ribonucleotide reductase<sup>2</sup>, marker gene<sup>3</sup>, misannotation<sup>4</sup>,  
8 cyanobacteria<sup>5</sup>, viral ecology<sup>6</sup>, phylogenetic analysis<sup>7</sup>, virome<sup>8</sup>

9 **Abstract**

10 Ribonucleotide reductases (RNRs) are ancient enzymes that catalyze the reduction of ribonucleotides  
11 to deoxyribonucleotides. They are required for virtually all cellular life and are prominent within  
12 viral genomes. RNRs share a common ancestor and must generate a protein radical for direct  
13 ribonucleotide reduction. The mechanisms by which RNRs produce radicals are diverse and divide  
14 RNRs into three major classes and several subclasses. The diversity of radical generation methods  
15 means that cellular organisms and viruses typically contain the RNR best-suited to the environmental  
16 conditions surrounding DNA replication. However, such diversity has also fostered high rates of  
17 RNR misannotation within subject sequence databases. These misannotations have resulted in  
18 incorrect translative presumptions of RNR biochemistry and have diminished the utility of this  
19 marker gene for ecological studies of viruses. We discovered a misannotation of the RNR gene  
20 within the *Prochlorococcus* phage P-SSP7 genome, which caused a chain of misannotations within  
21 commonly observed RNR genes from marine viroplankton communities. These RNRs are found in  
22 marine cyanopodo- and cyanosiphoviruses and are currently misannotated as Class II RNRs, which  
23 are O<sub>2</sub>-independent and require cofactor B<sub>12</sub>. In fact, these cyanoviral RNRs are Class I enzymes that  
24 are O<sub>2</sub>-dependent and may require a di-metal cofactor made of Fe, Mn, or a combination of the two  
25 metals. The discovery of an overlooked Class I  $\beta$  subunit in the P-SSP7 genome, together with  
26 phylogenetic analysis of the  $\alpha$  and  $\beta$  subunits confirms that the RNR from P-SSP7 is a Class I RNR.  
27 Phylogenetic and conserved residue analyses also suggest that the P-SSP7 RNR may constitute a  
28 novel Class I subclass. The reannotation of the RNR clade represented by P-SSP7 means that most  
29 lytic cyanophage contain Class I RNRs, while their hosts, B<sub>12</sub>-producing *Synechococcus* and  
30 *Prochlorococcus*, contain Class II RNRs. By using a Class I RNR, cyanophage avoid a dependence  
31 on host-produced B<sub>12</sub>, a more effective strategy for a lytic virus. The discovery of a novel RNR  $\beta$   
32 subunit within cyanopodoviruses also implies that some unknown viral genes may be familiar  
33 cellular genes that are too divergent for homology-based annotation methods to identify.

34

35 **1 Introduction**

36 Viruses are the most abundant biological entities on the planet, with an estimated  $10^{31}$  viral  
37 particles globally (Suttle, 2005). While viruses are known to infect cellular life from all three  
38 domains, viruses largely influence ecosystems through the infection of microbial hosts. In the  
39 oceans,  $10^{23}$  viral infections are estimated to take place every second, resulting in the mortality of  
40 approximately 20% of marine microbial biomass each day (Suttle, 2007). Cell lysis resulting from  
41 viral infection influences ocean biogeochemical cycling by returning particulate and dissolved  
42 organic matter to the water column (Jover et al., 2014; Suttle, 2005), where it may be taken up by  
43 microbial populations to fuel new growth, or exported to the deep ocean (Laber et al., 2018; Suttle,  
44 2007). Viral predation can also influence biogeochemical cycles through the restructuring of  
45 microbial populations (Rastelli et al., 2017), metabolic reprogramming of host cells (Lindell et al.,  
46 2005; Puxty et al., 2016), and horizontal gene transfer (Lindell et al., 2004).

47 While the importance of viruses within marine microbial communities is now commonly  
48 accepted, the biological and ecological details of viral-host interactions that influence the  
49 transformations of nutrient elements in ecosystems are largely unknown. Attempting to reveal these  
50 details, researchers have turned to metagenomics and metatranscriptomics for assessing the genetic  
51 repertoire and biological potential of unknown microbial and viral populations (Brum et al., 2015;  
52 Coutinho et al., 2017; Moniruzzaman et al., 2017; Roux et al., 2016). Bridging the gap between  
53 genetic observations and ecosystem-level effects requires an understanding of the connections  
54 between genes and phenotypes. Among viruses infecting marine microbes, genes involved in  
55 nucleotide metabolism and viral replication are highly predictive of viral phenotype and evolutionary  
56 history (Dolja and Koonin, 2018; Iranzo et al., 2016; Kazlauskas et al., 2016).

57 For example, a point mutation in motif B of the family A DNA polymerase gene (*polA*) is  
58 indicative of viral life style (Chopyk et al., 2018; Schmidt et al., 2014). Another useful viral marker  
59 gene is ribonucleotide reductase (RNR). RNRs catalyze the rate-limiting step of DNA synthesis  
60 (ribonucleotide reduction) (Ahmad et al., 2012; Kolberg et al., 2004), and are therefore prominent in  
61 the genomes of lytic dsDNA phage (Dwivedi et al., 2013; Iranzo et al., 2016; Sakowski et al., 2014).  
62 They are ancient enzymes thought to have been essential in the transition from an RNA world to a  
63 DNA world (Lundin et al., 2015; Wächtershäuser, 2006) and have evolved into several classes and  
64 subclasses with diverse biochemical mechanisms and nutrient requirements (Nordlund and Reichard,  
65 2006). Thus, the biochemical class of RNR used by a cell or virus can reflect the environmental  
66 conditions surrounding DNA replication (Cotruvo et al., 2011; Reichard, 1993; Sakowski et al.,  
67 2014).

68 All RNRs share a common catalytic mechanism in which a thiyl radical in the active site  
69 removes a hydrogen atom from the 3' hydroxyl group of the ribose sugar, thereby activating the  
70 substrate (Licht et al., 1996; Logan et al., 1999; Lundin et al., 2015). The mechanism by which the  
71 thiyl radical is generated varies greatly among RNRs and provides the biochemical basis dividing the  
72 three major RNR classes (Lundin et al., 2015). Extant RNRs are also commonly divided by their  
73 reactivity with  $O_2$  (Reichard, 1993): Class I RNRs are  $O_2$ -dependent; Class II RNRs are  $O_2$ -  
74 independent; and Class III RNRs are  $O_2$ -sensitive (Fig. 1a).

75 Class III RNRs are the most ancient form of the enzyme and the most dissimilar of the extant  
76 types (Aravind et al., 2000; Lundin et al., 2015). They produce a radical on a small activase subunit,  
77 NrdG, before passing it to a larger catalytic subunit, NrdD (Nordlund and Reichard, 2006). The  
78 activase is a radical SAM protein, which creates a radical by cleaving *S*-adenosylmethionine using an  
79 iron-sulfur cluster (Mulliez et al., 1993). Like other glycyl radical enzymes, Class III RNRs  
80 temporarily store this radical on a glycine residue in the C-terminus of the catalytic subunit. In the

81 presence of oxygen, the glycy radical reacts immediately with O<sub>2</sub>, resulting in fragmentation and  
82 inactivation of NrdD (Eliasson et al., 1992; King and Reichard, 1995). Therefore, Class III RNRs are  
83 found only in strict or facultative anaerobes and their viruses (Fontecave et al., 2002).

84 Class II RNRs emerged after Class III (Lundin et al., 2015) and are the only RNRs that do not  
85 require separate subunits for radical generation and catalysis (Nordlund and Reichard, 2006).  
86 Instead, Class II RNRs are encoded by a single gene, *nrdJ*. Class II RNRs require  
87 adenosylcobalamin (AdoCbl), a form of B<sub>12</sub>, to produce a radical, which is then shuttled along the  
88 enzyme to the active site (Blakley and Barker, 1964; Lundin et al., 2010). There are two types of  
89 Class II RNR: monomeric and dimeric (Nordlund and Reichard, 2006). The monomeric form is  
90 commonly referred to as ribonucleotide triphosphate reductase (RTPR). Monomeric and dimeric  
91 Class II RNRs are phylogenetically distinct (Lundin et al., 2010), and it is unclear which evolved first  
92 (Lundin et al., 2015), although there is some speculation that the monomeric form arose from the  
93 duplication of a portion of the gene encoding the dimeric form (Sintchak et al., 2002).

94 Class I RNRs are the most recent (Lundin et al., 2015) and the most complex of the extant  
95 RNRs (Fig. 1b). Like the Class III RNR, radical generation takes place on a smaller subunit ( $\beta$  or  
96 R2) and is transferred to a larger catalytic subunit ( $\alpha$  or R1) (Jordan and Reichard, 1998). The  $\alpha$   
97 subunit is encoded by *nrdA* or *nrdE* and the  $\beta$  subunit is encoded by *nrdB* or *nrdF*. These genes form  
98 exclusive pairs: *nrdA* is found only with *nrdB* (*nrdAB*), and *nrdE* is found only with *nrdF* (*nrdEF*).  
99 Notably, the Class I  $\alpha$  subunit is thought to have evolved directly from dimeric Class II RNRs, so  
100 they share several catalytic sites (Lundin et al., 2015). The radical initiation mechanism of the  $\beta$   
101 subunit further divides Class I RNRs into five subclasses (a-e) (Blaesi et al., 2018; Cotruvo et al.,  
102 2011, 2013; Rose et al., 2018) (Fig. 1b). Subclass Ia uses a diiron cluster activated by O<sub>2</sub> to oxidize a  
103 tyrosine residue, thus forming a stable protein radical (Cotruvo et al., 2011). Subclass Ib also forms a  
104 stable radical on a tyrosine residue in the  $\beta$  subunit, but instead uses a dimanganese cluster and is  
105 oxidized by superoxide rather than O<sub>2</sub> (Cotruvo et al., 2013). Subclass Ic is activated by O<sub>2</sub>, but does  
106 not form a protein radical (Högbom et al., 2004). Instead, its di-metal cluster (Mn/Fe) is used  
107 directly to produce the thiyl radical on the  $\alpha$  subunit (Jiang et al., 2007). Like subclass Ic enzymes,  
108 subclass Id generates the thiyl radical directly with the use of a di-metal cofactor (Mn<sub>2</sub>) (Rose et al.,  
109 2018). However, like subclass Ib, it is unreactive to O<sub>2</sub> and is activated by superoxide (Cotruvo et  
110 al., 2013; Rose et al., 2018). Finally, subclass Ie enzymes are metal-free, instead using a  
111 dihydroxyphenylalanine (DOPA) radical as the initiator in an O<sub>2</sub> dependent reaction (Blaesi et al.,  
112 2018). Subclasses Ib and Ie also require a separate flavodoxin activase, NrdI. Class I RNRs are  
113 generally presumed to be subclass Ia enzymes unless they can be assigned to another subclass based  
114 on sequence homology to a close relative that has been biochemically characterized (Berggren et al.,  
115 2017).

116 While the diversity of RNR biochemistry makes this enzyme an excellent marker for inferring  
117 aspects of viral biology, proper annotation of RNR genes is imperative for this purpose.  
118 Unfortunately, this same diversity has also fostered high misannotation rates, with one study  
119 reporting that 77% of RNRs submitted to GenBank had misannotations (Lundin et al., 2009). Most  
120 of those misannotations (88%) were due to RNR sequences being assigned to the wrong class. In  
121 response, a specialty database (RNRdb) was created for maintaining a collection of correctly  
122 annotated RNRs (Lundin et al., 2009). Even with resources such as the RNRdb, however, the  
123 complexity of RNR annotation remains daunting for non-experts. Class I RNRs can be particularly  
124 difficult to identify, as their classification relies largely on the annotation of both an  $\alpha$  and  $\beta$  subunit.

125 Our prior work examining the phylogenetic relationships among RNRs from marine  
126 viroplankton revealed two large clades of cyanophage RNRs, the first made up of Class I enzymes  
127 and the second of Class II RNRs (Sakowski et al., 2014). The hosts of these cyanophage, marine  
128 *Synechococcus* and *Prochlorococcus*, carry Class II RNRs. Thus, the presence of such a large  
129 cyanophage clade with Class I RNRs was intriguing, and in contradiction to earlier findings that  
130 phage tend to carry an RNR gene similar to that of their host cell (Dwivedi et al., 2013). Now, the  
131 reanalysis of an RNR from the Class II-carrying cyanophage has revealed that the RNRs in this  
132 second clade are, in fact, Class I RNRs that were misannotated as Class II. The reannotation of the  
133 RNR from *Prochlorococcus* phage P-SSP7 from Class II to Class I implies that most known  
134 cyanophage carry RNRs that are not host-derived, nor dependent on B<sub>12</sub>. Additionally, our analysis  
135 suggests that the P-SSP7 RNR may represent a novel Class I RNR subclass.

## 136 **2 Materials and Methods**

### 137 **2.1 The Cyano SP Clade**

138 The RNR from *Prochlorococcus* phage P-SSP7 is a member of the ‘Cyano II’ RNR clade, as  
139 recognized by Sakowski et al. (Sakowski et al., 2014) in a study of viroplankton RNRs. Based on  
140 our analysis, and to avoid confusion with the nomenclature for RNR classes, we have renamed the  
141 Cyano II clade to the Cyano SP clade, as RNRs in this clade are exclusively found within the  
142 cyanosiphon- and cyanopodoviruses (Sakowski et al., 2014). We have also renamed the Cyano I clade  
143 to the Cyano M clade, as RNRs in this clade are exclusively seen in cyanomyoviruses. The  
144 aforementioned study included ten reference sequences from the (now) Cyano SP clade. Eight of  
145 those ten references were used in the current study (Table 1). Cyanophage KBS-S-1A was excluded  
146 because its genome has not been fully sequenced and *Synechococcus* phage S-CBP3 was excluded  
147 because its RNR was missing a conserved catalytic site. P-SSP7 was chosen as the clade  
148 representative because it is the most well-studied phage from this group, has a full genome available,  
149 and is the source of the original RNR misannotation.

### 150 **2.2 Putative $\alpha$ and $\beta$ subunit identification**

151 Putative  $\alpha$  and  $\beta$  subunit sequences were extracted from the genome of *Prochlorococcus* phage  
152 P-SSP7 (genome accession no. NC\_006882.2). The putative Class I  $\alpha$  subunit is the RNR currently  
153 identified in the P-SSP7 genome as ribonucleotide reductase class II (accession no. YP\_214197.1)  
154 and was downloaded from NCBI in April 2018. As P-SSP7 has no annotated  $\beta$  subunit, candidate  $\beta$   
155 sequences were identified based on length filtering of unannotated protein sequences. While Class I  
156  $\beta$  subunits are typically between 350 and 400 amino acids (Kolberg et al., 2004), we expanded our  
157 search range to avoid excluding any potential Class I  $\beta$  subunits. Four candidate, unannotated  
158 proteins between 200 and 500 amino acids in length were downloaded for analysis in May 2018.  
159 Candidate proteins were searched against the Conserved Domain Database using batch CD-Search  
160 (Marchler-Bauer et al., 2017).

161 The P-SSP7 putative Class I RNR  $\alpha$  subunit and four candidate  $\beta$  subunit proteins were  
162 imported into Geneious v10.2.4 (<https://www.geneious.com>) to analyze conserved residues. The  
163 putative  $\alpha$  subunit peptide sequence was aligned with one representative of each of the known Class I  
164 subclasses (Table 2) using the MAFFT v7.388 Geneious plug-in (Katoh and Standley, 2013) on the  
165 FFT-NS-ix1000 (iterative refinement method with 1000 iterations) setting with the BLOSUM62  
166 scoring matrix. If necessary, alignments were manually modified to ensure that annotated active sites  
167 in the subclass representatives were properly aligned. References have been biochemically  
168 characterized and have corresponding crystal structures, where possible. Active sites were annotated

169 for each of the subclass representatives based on literature reports and crystal structures. Residues  
170 from the putative P-SSP7 Class I  $\alpha$  subunit aligning with active sites in subclass representatives were  
171 recorded (Table 3). Candidate Class I  $\beta$  subunit proteins were analyzed individually in the same  
172 manner, using the  $\beta$  subunits corresponding to the Class I  $\alpha$  subclass representatives (Table 2).  
173 P-SSP7 candidate  $\beta$  subunit proteins lacking key residues were removed from the analysis. This left  
174 a single candidate  $\beta$  subunit protein (accession no. YP\_214198.1). Putative active sites identified in  
175 the putative  $\beta$  subunit are recorded in Table 3.

## 176 **2.3 Phylogenetic analysis**

### 177 **2.3.1 Phylogenetic reference sequence curation**

178 To create a reference sequence set for phylogenetic analyses, all available Class I  $\alpha$  (NrdA and  
179 NrdE), Class I  $\beta$  (NrdB and NrdF), and Class II (NrdJ) sequences were downloaded from the RNRdb  
180 on August 20, 2018 (Lundin et al., 2009). Sequences were separated into three sets (Class I  $\alpha$ , Class I  
181  $\beta$ , and Class II) before sequence curation. Exact and sub-string matches were removed from each set  
182 using CD-HIT v4.6 (Fu et al., 2012; Li and Godzik, 2006). Sequences were then divided into smaller  
183 groups of similar sequences identified by the RNRdb. RNRdb group assignment is based on  
184 phylogenetic clade membership (Berggren et al., 2017; Rozman Grinberg et al., 2018a), so division  
185 increased sequence alignment quality. Group names and subclass membership are presented in Table  
186 4. RNRdb sequences were aligned individually by group using the MAFFT v7.388 Geneious plug-in  
187 on AUTO setting with the BLOSUM62 scoring matrix. Sequence alignments were visualized and  
188 edited in Geneious v10.2.4. Inteins within RNRdb sequences were removed manually after the initial  
189 alignment step because they are evolutionarily mobile and confound phylogenetic analyses (Gogarten  
190 et al., 2002; Perler et al., 1997). After intein removal, sequences were realigned and those lacking  
191 essential catalytic residues were removed, as they are likely non-functional (Sakowski et al., 2014).  
192 Other than the two tyrosine residues involved in Class I radical transport (Y730 and Y731, *E. coli*),  
193 the same conserved residues were used for Class I  $\alpha$  and Class II sequences (Table 3). Both intein  
194 removal and catalytic residue identification for all groups were done with guidance from the  
195 annotated Class I subclass and Class II representatives (Table 2).

### 196 **2.3.2 Sequence preparation**

197 Broadly, three categories of phylogenies were constructed from protein sequences: (i) Class I  
198  $\alpha$ -only, (ii) Class I  $\beta$ -only, and (iii) Class I  $\alpha$  with Class II. All phylogenies included Cyano SP clade  
199 members (Table 1). Class I  $\alpha$  and Class II proteins share a common ancestor (Lundin et al., 2015),  
200 but are phylogenetically unrelated to Class I  $\beta$  proteins. Class I  $\alpha$  and Class II proteins also share a  
201 common catalytic mechanism and most active sites, but are divergent enough that full-length protein  
202 sequences from both classes cannot be presented on the same phylogeny (Lundin et al., 2010). Thus,  
203 Class I  $\alpha$  and Class II protein sequences in this analysis were trimmed to a previously defined region  
204 of interest that excluded regions not shared between the two groups (N437-S625, *E. coli*  
205 CQR81730.1) (Sakowski et al., 2014). The Class I  $\alpha$ -only phylogeny allowed for greater resolution,  
206 as the phylogeny could be based on a longer protein sequence segment, being trimmed only before  
207 C225 in *E. coli* (CQR81730.1). Class I  $\beta$  sequences were trimmed to the region between W48 and  
208 Y356 (*E. coli*, KXG99827.1). For Class I  $\alpha$ -only and Class I  $\beta$ -only phylogenies, sequences were  
209 trimmed near the N-terminus to exclude evolutionarily mobile ATP cone domains (Aravind et al.,  
210 2000). Class I  $\beta$  sequences were also trimmed near the C-terminus to exclude any fused glutaredoxin  
211 domains (Rozman Grinberg et al., 2018b). In all cases, trimming was guided by annotated Class I  
212 subclass (a-e) and Class II subtype (mono- or dimeric) representatives (Table 2).

213 In addition to trimming, sequences were clustered prior to phylogenetic analysis, as each  
214 group contained a large number of sequences (Class I  $\alpha$ : 15,894 sequences, Class I  $\beta$ : 17,109  
215 sequences, and Class II: 9,147 sequences). To avoid inter-group mixing within individual sequence  
216 clusters, sequences were clustered by RNRdb group (Table 4). Clustering of RNRdb sequences was  
217 performed at multiple identity thresholds (70%, 75%, and 80%) using CD-HIT v4.7 to ensure that the  
218 placement of the Cyano SP clade was not an artifact of the identity threshold, as Cyano SP members  
219 have grouped with Class II sequences in the past (Sakowski et al., 2014). Cyano SP sequences were  
220 not clustered before phylogenetic analysis. For Class I  $\alpha$ -only and  $\beta$ -only phylogenies, sequences  
221 were clustered over 80% of the alignment length. For the Class I  $\alpha$  with Class II phylogeny,  
222 sequences were clustered over 100% of the alignment length due to the short length of the trimmed  
223 region.

224 Two RNRdb groups, NrdABz and NrdEF, contained member sequences belonging to two  
225 Class I subclasses (Table 4). In these cases, the Class I  $\beta$  sequences (NrdBz and NrdF) were assigned  
226 to subclasses based on active sites. For NrdBz, Class I  $\beta$  subunit enzymes were classified as subclass  
227 Ia (NrdBza) by the presence of a Tyr residue in the Tyr radical site (Tyr122 in *E. coli* R2), or as  
228 subclass Ic (NrdBzc) by the presence of a Phe, Leu, or Val mutation in the Tyr radical site (Lundin et  
229 al., 2009). For NrdF, Class I  $\beta$  subunit enzymes were classified as subclass Ib (NrdFb) or Ie (NrdFe)  
230 if carboxylate residues were conserved or missing, respectively, from the second, fourth, and fifth  
231 metal-binding sites in relation to the subclass Ib representative (Table 2). Class I  $\alpha$  sequences  
232 (NrdAz and NrdE), which could not be assigned to subclasses based on primary sequence alone, were  
233 assigned to a subclass based on the assignment of their corresponding  $\beta$  subunits. Class I  $\alpha$  subunit  
234 sequences that were not able to be paired with a  $\beta$  subunit, or that were paired with more than one  $\beta$   
235 subunit, were excluded from further analysis. Excluded Class I  $\alpha$  subunit sequences included 1006  
236 NrdAz and 2921 NrdE sequences, or 31% and 45% of total curated NrdAz and NrdE sequences,  
237 respectively. The excluded sequences comprised a small percentage of overall RNR diversity (Table  
238 S1). Thus, their exclusion is not expected to have affected the phylogenetic analyses (Table S1). All  
239 other RNRdb groups exclusively belonged to a single subclass.

### 240 **2.3.3 Phylogenetic tree construction**

241 For all phylogenetic analyses and clustering identity thresholds, cluster representatives were  
242 aligned with correspondingly trimmed  $\alpha$  or  $\beta$  subunits from the Cyano SP clade. All alignments were  
243 constructed in Geneious using the MAFFT v7.388 plug-in with setting FFT-NS-2 (fast, progressive  
244 method) and the BLOSUM62 scoring matrix. Trees were constructed using the FastTree v2.1.5  
245 (Price et al., 2010) Geneious plug-in with default settings. Trees were visualized and customized in  
246 Iroki (Moore et al., 2018). Phylogenies inferred from sequences clustered at different identity  
247 thresholds can be found in the supplement (Figs. S1-S3).

248 Finally, a phylogeny was constructed from trimmed Class I  $\alpha$  subunit and Class II sequences  
249 from only cyanobacteria and cyanophage. No clustering was performed. The phylogeny was  
250 constructed as described above from an alignment done using the MAFFT v7.388 plug-in with  
251 setting FFT-NS-ix1000 (iterative refinement method with 1000 iterations).

### 252 **2.4 Sequence similarity network**

253 A protein sequence similarity network (SSN) was constructed with the same RNR Class I  $\beta$   
254 subunit sequences used for phylogenetic analysis. The SSN was generated with the Enzyme  
255 Similarity Tool (EFI-EST) (Gerlt et al., 2015) as in Rose et al. (E-value: 5, fraction: 1, minimum  
256 alignment score: 90) (Rose et al., 2018). As the full network was too large to visualize in Cytoscape

257 (Shannon et al., 2003; Smoot et al., 2011), the 90% identity representative node network was used  
258 (i.e., each node in the network contained sequences that shared at least 90% amino acid identity).

### 259 **3 Results**

260 *Prochlorococcus* phage P-SSP7 is a cyanopodovirus that infects the marine cyanobacterium  
261 *Prochlorococcus marinus* subsp. *pastoris* str. CCMP1986 (Sullivan et al., 2005). The RNR  
262 discovered in P-SSP7 was initially annotated as Class II based on the apparent lack of a Class I  $\beta$   
263 subunit in the phage genome. The RNR from P-SSP7 also lacks an ATP cone region, a domain that  
264 is common in Class I  $\alpha$  subunits but rare in Class II enzymes (Aravind et al., 2000; Jonna et al.,  
265 2015). This was also the first cyanophage RNR of its kind to be annotated, and consequently this  
266 gene became the baseline annotation for closely related RNRs. Prior examination of RNRs in viral  
267 shotgun metagenomes (viromes) designated the phylogenetic clade containing the RNR from P-SSP7  
268 as the ‘Cyano II’ clade, recognizing that member RNRs (Table 1), exclusively from cyanophage,  
269 were annotated as Class II and seemed to fall on the Class II side of the tree (Sakowski et al., 2014).  
270 This study also recognized a ‘Cyano I’ clade composed exclusively of cyanomyoviruses that carried  
271 Class I RNRs (Sakowski et al., 2014). The Cyano II clade has been renamed to Cyano SP, as the  
272 clade is comprised solely of RNRs from cyanosipho- and cyanopodoviruses. The Cyano I clade has  
273 been renamed to Cyano M, as it consists of RNRs strictly from cyanomyoviruses.

#### 274 **3.1 P-SSP7 Class I $\alpha$ subunit identification.**

275 The first indication that the RNR from P-SSP7 was misannotated as a Class II RNR came from  
276 the observation of two consecutive tyrosine residues (Y730 and Y731 in *E. coli*) that are present in  
277 the C-terminus of Class I  $\alpha$  subunits and participate in long-range radical transport between the  $\alpha$  and  
278  $\beta$  subunits of Class I RNRs (Greene et al., 2017; Uhlin and Eklund, 1994). These tyrosines are not  
279 present in Class II RNRs but are present in the P-SSP7 RNR peptide (Table 2). To confirm the  
280 classification of the P-SSP7 RNR as a Class I enzyme, a phylogenetic tree was constructed  
281 containing Class I  $\alpha$  subunits and Class II sequences from the RNRdb, together with the putative  $\alpha$   
282 subunits from the Cyano SP clade (formerly Cyano II) reported in Sakowski et al. (Sakowski et al.,  
283 2014) (Fig. 2). Trees were constructed at different clustering identities to ensure that the placement  
284 of Cyano SP sequences with a given RNR class was not an artifact of the clustering threshold (Fig.  
285 S1). The Cyano SP RNRs grouped with the Class I  $\alpha$  subunit sequences in the phylogenies  
286 constructed from sequences clustered at 75% and 80% identity, but clustered with Class II sequences  
287 in the tree made from sequences clustered 70% identity.

#### 288 **3.2 P-SSP7 Class I $\beta$ subunit identification.**

289 While the tyrosine residues within the P-SSP7 RNR are indicative of a Class I RNR, the initial  
290 annotation of the P-SSP7 RNR was made primarily because no  $\beta$  subunit gene could be identified  
291 within the P-SSP7 genome. Class I RNRs require a  $\beta$  subunit for radical generation. Because the  
292 cyanobacterial host of P-SSP7 carries a Class II RNR, the phage would have to carry its own copy of  
293 the Class I  $\beta$  subunit gene in order for its  $\alpha$  subunit to function. All unannotated proteins in the  
294 P-SSP7 genome approximately the length of a Class I  $\beta$  subunit in the P-SSP7 genome were  
295 considered RNR  $\beta$  subunit candidates. Four predicted proteins within the genome matched this  
296 length criteria. A batch CD-Search (Marchler-Bauer et al., 2017) of the candidate  $\beta$  subunit peptide  
297 sequences was unable to identify any conserved domains in any of the sequences. Thus, we aligned  
298 the candidate P-SSP7  $\beta$  subunit sequences with the sequences of biochemically characterized  $\beta$   
299 subunits from each of the known Class I subclasses (Table 2). Only one of the candidate sequences,

300 accession no. YP\_214198.1, was found to contain residues experimentally shown to be required for  $\beta$   
301 subunit function (Table 3). The hypothetical protein also resided directly downstream of the  $\alpha$   
302 subunit, where the  $\beta$  subunit is typically found (Dwivedi et al., 2013). Thus, YP\_214198.1 was  
303 identified as the missing P-SSP7  $\beta$  subunit.

### 304 3.3 Assignment of P-SSP7 RNR to a Class I subclass

305 Class I subclasses are based on the mechanism of radical generation utilized by the  $\beta$  subunit.  
306 Alignment with representative Class I RNR  $\beta$  subunit sequences found that the P-SSP7  $\beta$  subunit  
307 lacked the tyrosine residue (Y122 in *E. coli* R2) on which the stable protein radical is formed in  
308 subclasses Ia, Ib, and Ie (Fig. 1b). The lack of the tyrosine residue seemed to indicate that the  
309 P-SSP7  $\beta$  subunit belonged to subclass Ic, as Ic is the only described subclass that lacks this residue  
310 completely (the residue is conserved in Id but does not harbor a radical) (Blaesi et al., 2018; Högbom  
311 et al., 2004; Rose et al., 2018). Each subclass has a unique combination of metal-binding residues  
312 and uses a different metallocofactor (or does not bind metals at all, in the case of subclass Ie) (Blaesi  
313 et al., 2018). The residues in the putative P-SSP7  $\beta$  subunit aligning with the first sphere of metal-  
314 binding residues of the subclass representatives (Table 5) were consistent with Class I RNRs that  
315 require metallocofactors (subclasses Ia-Id) and exactly matched subclasses Ic and Id (Blaesi et al.,  
316 2018). However, when considering second sphere binding residues, the overall pattern of metal-  
317 binding residues in the P-SSP7  $\beta$  subunit did not match that of any subclass representative (Table 5),  
318 nor of any existing RNRdb group (Table 6).

319 Known Class I subclasses are either monophyletic or contain members that are closely related  
320 (Berggren et al., 2017; Rozman Grinberg et al., 2018a). Thus, phylogenetic trees were constructed to  
321 confirm proper subclass assignment of the P-SSP7 RNR using Class I  $\beta$  subunit sequences from the  
322 RNRdb clustered at 70%, 75%, and 80% and  $\beta$  subunits from the Cyano SP clade members. In a  
323 phylogenetic analysis of the 70% identity cluster representative sequences, the P-SSP7  $\beta$  subunit and  
324 Cyano SP homologs were phylogenetically distinct from known RNRs, and did not clearly join with  
325 RNRdb groups, instead branching directly off the backbone of the tree (Fig. 3). In the phylogenetic  
326 reconstructions at 75% and 80% identity, the Cyano SP grouped remained distinct but branched  
327 closely with either the NrdBg group (75% identity, subclass Ia) or the NrdBh group (80% identity,  
328 subclass Ia presumed) (Fig. S2). Notably, the Cyano SP  $\beta$  subunits branched away from subclass Ic  
329 members (NrdBzc subgroup) in all phylogenies (Fig. S2), making it unlikely that the Cyano SP clade  
330 belongs to subclass Ic.

331 Because Class I subclass assignment was inconclusive based on the  $\beta$  subunit metal-binding  
332 residues and phylogenetic analysis, we constructed a protein sequence similarity network (SSN)  
333 using the Enzyme Similarity Tool (EFI-EST) (Gerlt et al., 2015) as per Rose et al. (Rose et al., 2018)  
334 with the same  $\beta$  subunit sequences used for phylogenetic tree construction (Fig. 4). Most sequences  
335 were members of large, distinct subgraphs with sequences exclusively from a single RNRdb group  
336 (e.g., NrdBk and NrdBg). However, some RNRdb groups were evenly spread across multiple  
337 subgraphs of similar size (e.g., NrdBh and NrdBi), likely indicating a higher level of sequence  
338 heterogeneity than other groups. The Cyano SP clade representatives formed exclusive subgraphs  
339 not connected to other RNRdb sequences, and were divided into three singleton and one non-  
340 singleton cluster, indicating that the clade representatives are divergent even from each other.

341 Assignment of the Cyano SP RNRs to an existing Class I subclass could not be reliably made  
342 based on the analysis of  $\beta$  subunit metal-binding residues, phylogenies, or the protein SSN. Instead,  
343 the missing tyrosine radical residue, unique pattern of metal-binding sites, and phylogenetic



344 divergence of the Cyano SP  $\beta$  subunits from RNRdb groups likely indicate that the Cyano SP clade  
345 represents a novel Class I subclass.

### 346 **3.4 Origin of the P-SSP7 RNR.**

347 Class I  $\alpha$  and  $\beta$  subunits tend to evolve in units, producing highly similar phylogenies (Dwivedi  
348 et al., 2013; Lundin et al., 2010). Because placement of the Cyano SP  $\beta$  subunits on phylogenetic  
349 trees changed with the percent amino acid identity used for clustering RNR sequences (Fig. S2), the  
350 Cyano SP  $\alpha$  subunits were evaluated for clues to the origin of the RNR in P-SSP7. Class I  $\alpha$ -only  
351 phylogenies were built from sequences longer than those used for the combined Class I  $\alpha$ -Class II  
352 phylogenies, allowing greater phylogenetic resolution. Representative RNRdb Class I  $\alpha$  subunit  
353 sequences from 70%, 75%, and 80% identity clusters were assessed. Regardless of the clustering  
354 identity, the Class I  $\alpha$  subunit phylogenies showed consistent placement of the Cyano SP clade as an  
355 outgroup for the branch that contains RNRdb groups NrdAi (subclass Id) and NrdAk (subclass Ia  
356 presumed) (Figs. 5 and S3). Like the Class I  $\beta$  phylogenies, the Cyano SP  $\alpha$  subunit clade was  
357 distinct and was not surrounded by any RNRdb group. The phylogenetic placement of the Cyano SP  
358 Class I  $\alpha$  sequences among RNRdb groups (Fig. 5 & Fig. S3) was different from that seen for the  
359 Cyano SP Class I  $\beta$  sequences (Fig. 3 & Fig. S2). Thus, a conclusive placement for the Cyano SP  $\beta$   
360 subunits among RNRdb groups was not possible.

## 361 **4 Discussion**

### 362 **4.1 The Cyano SP RNR has adapted to the intracellular environment**

363 The perceived lack of a  $\beta$  subunit gene in the P-SSP7 genome and the lack of an ATP cone  
364 domain may have led to the initial misannotation of the P-SSP7 RNR gene as a Class II RNR  
365 (Sullivan et al., 2005). Additionally, it seems unusual for a virus to carry a different class of RNR  
366 than its host (Dwivedi et al., 2013). Given that cellular organisms carry RNRs that are adapted to  
367 their environmental niche (Cotruvo et al., 2011; Reichard, 1993), viruses would also likely benefit  
368 from having the same RNR type as their host cell. For example, because marine Cyanobacteria  
369 evolved before the Great Oxidation Event (Shestakov and Karbysheva, 2017), they carry Class II  
370 RNRs, which do not require oxygen. Widespread iron limitation in the oceans (Moore et al., 2013)  
371 and the ability to produce B<sub>12</sub> (Helliwell et al., 2016) have likely selected against the acquisition of a  
372 Class I RNR in marine Cyanobacteria. Thus, given that P-SSP7 would be infecting its host in those  
373 same iron limited conditions, and that the acquisition of the host RNR would likely increase its  
374 fitness, P-SSP7 might also be expected to carry a Class II RNR.

375 The preference for a potentially iron-dependent Class I RNR enzyme among cyanophage seems  
376 puzzling considering that iron is often the primary limiting nutrient in the oceans, including in  
377 regions dominated by *Synechococcus* and *Prochlorococcus* (Browning et al., 2017; Moore et al.,  
378 2013). *Synechococcus* and *Prochlorococcus*, hosts infected by phages within the Cyano SP  
379 (cyanosipho- and cyanopodoviruses) (Table 1) and Cyano M (cyanomyoviruses) clades, are some of  
380 the few B<sub>12</sub> producers in the oceans (Heal et al., 2016; Helliwell et al., 2016). Therefore, B<sub>12</sub>  
381 availability would seem to be sufficient for viral replication with a B<sub>12</sub>-dependent Class II RNR,  
382 while iron availability for phage-infected cells could be too low to support the highly lytic phenotype  
383 displayed by many of these phages.

384 However, carrying a Class I RNR would relieve marine cyanophage of their dependence on the  
385 host to produce sufficient levels of B<sub>12</sub> for deoxyribonucleotide synthesis by a Class II enzyme.  
386 Although it is less limiting than iron in ocean waters, B<sub>12</sub> is likely to be more limiting than iron inside

387 a cyanobacterial cell. In Cyanobacteria, B<sub>12</sub> is used as a cofactor for two enzymes, the Class II RNR  
388 (NrdJ) and methionine synthase MetH (Heal et al., 2016). NrdJ is needed only while the cell is  
389 actively replicating, thus, transcription of this gene is closely tied with the cell cycle (Herrick and  
390 Sclavi, 2007; Mowa et al., 2009). Similarly, MetH expression is high during early growth of the B<sub>12</sub>-  
391 producing cyanobacterium *Synechocystis* but decreases when cells enter the stationary growth phase  
392 (Tanioka et al., 2009). Given that NrdJ and MetH are both tied to cellular growth, intracellular B<sub>12</sub>  
393 concentrations are likely highly variable. In addition, cobalt, the metal at the center of B<sub>12</sub>, is  
394 required almost exclusively for B<sub>12</sub> formation and is tightly controlled because of its toxicity to cells  
395 (Huertas et al., 2014; Waldron et al., 2009). In contrast, both iron and manganese are required for  
396 numerous proteins and molecules within a cyanobacterial cell that are needed throughout the cell  
397 cycle (Palenik et al., 2003; Shcolnick and Keren, 2006). Cytoplasmic cyanobacterial iron and  
398 manganese quotas have been documented at 10<sup>6</sup> atoms/cell (Keren et al., 2002, 2004) and a study that  
399 aimed to identify and quantify metals in a cyanobacterium found that iron was present in high  
400 intracellular concentrations, while cobalt concentrations were below the detection limit (Barnett et  
401 al., 2012). Furthermore, some *Prochlorococcus* are able to maintain growth while up-taking just one  
402 atom of cobalt per cell per hour (Hawco and Saito, 2018). Therefore, upon infection, a cyanophage  
403 would encounter an intracellular pool of iron many fold larger than that of B<sub>12</sub>.

404 The acquisition of B<sub>12</sub> from the surrounding environment also seems unlikely. B<sub>12</sub> is bulky  
405 and structurally complex, requiring special transporters which neither *Prochlorococcus*,  
406 *Synechococcus*, nor their phages are known to encode (Pérez et al., 2016; Rodionov et al., 2003;  
407 Tang et al., 2012). Furthermore, one study showed that while some organisms, such as eukaryotic  
408 microalgae, are able to import partial or finished forms of B<sub>12</sub>, *Synechococcus* and likely  
409 *Prochlorococcus* are unable to do this (Helliwell et al., 2016). Instead, *Synechococcus* is required to  
410 synthesize B<sub>12</sub> start to finish (Helliwell et al., 2016), likely because both *Prochlorococcus* and  
411 *Synechococcus* produce a form of B<sub>12</sub> that seems to be unique to Cyanobacteria (Heal et al., 2016).

412 Finally, B<sub>12</sub> is energetically expensive to synthesize and structurally complex. B<sub>12</sub> synthesis  
413 requires a long pathway made up of roughly twenty different enzymes (Warren et al., 2002). By  
414 comparison, some Class I RNR metallocofactors are known to self-assemble (Cotruvo et al., 2011).  
415 At most, a metallocofactor may require a flavodoxin (NrdI) for assembly (Blaesi et al., 2018). When  
416 considering that carrying a Class I enzyme relieves the phage of relying on a complex host-mediated  
417 pathway for a molecule that is not consistently produced throughout the cell cycle, the difference in  
418 RNR type between host and phage is not surprising.

419 The RNR from P-SSP7 also seems to have adapted to the environment inside the host cell in  
420 other ways. The P-SSP7 β subunit lacks the tyrosine residue used for radical generation in most  
421 Class I RNR subclasses (Fig. 1b). The tyrosine residue harbors a stable protein radical and is a target  
422 of nitric oxide (Eiserich et al., 1995; Radi, 2004). Tyrosine-radical scavenging nitric oxide is  
423 hypothesized to be present inside *Synechococcus* cells as an intermediate in nitrate reduction  
424 (Preimesberger et al., 2017), which is widespread among freshwater and marine *Synechococcus*  
425 species and is coupled to photosynthesis (González et al., 2006; Guerrero, 1985; Klotz et al., 2015;  
426 Sunda and Huntsman, 2015). Thus, the loss of the tyrosine radical site in the Class I β subunit genes  
427 of cyanophage, such as P-SSP7, would enable these phages to avoid RNR inactivation by nitric  
428 oxide.

429

430

## 431 4.2 Connections between RNR and cyanophage phenotype

432 Most Class I RNR  $\alpha$  subunits contain an ATP cone region. ATP cones are regulatory sites  
433 that essentially act as on/off switches for RNRs (Aravind et al., 2000; Brown and Reichard, 1969).  
434 When ATP is bound, the RNR holoenzyme enters a conformational state that allows for function  
435 (Eriksson et al., 1997). Once dNTP levels rise high enough, dATP binds the ATP cone and the  
436 holoenzyme enters a non-functional conformation (Eriksson et al., 1997; Mathews, 2006).  
437 Intriguingly, the Class I  $\alpha$  subunits of the Cyano SP clade do not have ATP cones. This is unusual  
438 for Class I  $\alpha$  subunits and likely represents an evolutionary loss, given that only two Class I  $\alpha$  subunit  
439 clades (NrdAi/NrdAk and NrdEb/NrdEe) (Fig. 5) lack ATP cones (Aravind et al., 2000; Jonna et al.,  
440 2015). In losing the ATP cone domain, the Cyano SP RNRs have lost this regulatory switch. As a  
441 consequence, the RNR of cyanopodo- and cyanosiphoviruses cannot be inactivated through dATP  
442 binding, thereby leading to unregulated production of deoxyribonucleotides for DNA replication.  
443 This phenotype would be beneficial to a fast-replicating lytic phage (Chen et al., 2009).

444 The highly lytic nature of the Cyano SP clade is also reflected in the biochemistry of the  
445 family A DNA polymerase gene (*polA*) carried by some of the members of the clade (Table 1). The  
446 amino acid residue at position 762 (*E. coli* numbering) plays a role in shaping the activity and fidelity  
447 of Pol I (*polA* peptide) and is hypothesized to be reflective of phage lifestyle (Schmidt et al., 2014).  
448 Prior work found that a mutation from phenylalanine to tyrosine at position 762 produced a 1,000-  
449 fold increase in processivity with a concomitant loss of fidelity (Tabor and Richardson, 1987). Three  
450 of the member phages within the Cyano SP clade carry a Pol I with a tyrosine at position 762,  
451 indicating that Cyano SP members are capable of fast DNA replication. Other members carry *polA*  
452 genes that contain a frameshift mutation, preventing identification of the 762 position. Pairing an  
453 unregulated RNR, such as the Cyano SP RNR, with a highly processive DNA polymerase would be  
454 advantageous for a highly lytic phage. This phenotype is thought to be characteristic of most  
455 cyanopodoviruses (Schmidt et al., 2014; Suttle and Chan, 1993; Wang and Chen, 2008).  
456 Observations of gene associations such as Tyr762 PolA and Cyano SP clade Class I RNR can thus  
457 inform predictions of the possible life history characteristics of unknown viruses.

## 458 4.3 A novel Class I RNR in cyanophage

459 Reannotation of the P-SSP7 RNR from Class II to Class I is based primarily on the discovery  
460 of a Class I  $\beta$  subunit in the P-SSP7 genome. The P-SSP7  $\beta$  subunit was identified using conserved  
461 residues, as no conserved domains could be identified in the previously hypothetical protein. Our  
462 discovery of the Class I  $\beta$  subunit via active sites and genome location demonstrates that some  
463 unknown viral proteins (i.e., the viral genetic dark matter) (Krishnamurthy and Wang, 2017) could  
464 actually be well known proteins that are simply too divergent for annotation using homology  
465 searches or gene model approaches.

466 The reannotation is also supported by the presence of the consecutive tyrosine residues in the  
467 C-terminus of the newly annotated Class I  $\alpha$  subunit, which are essential for radical transfer between  
468 Class I  $\alpha$  and  $\beta$  subunits (Greene et al., 2017; Uhlin and Eklund, 1994) and are not found in Class II  
469 RNRs. Additionally, two trees constructed from Class I  $\alpha$  and Class II sequences showed the Cyano  
470 SP clade (represented by P-SSP7) on the Class I side of the tree (Fig. 2 and Fig. S1b). While the  
471 70% Class I  $\alpha$  with Class II tree showed the Cyano SP clade on the Class II side of the tree, we  
472 believe this is an artifact of the low identity threshold and short region of interest (Fig. S1a). Protein  
473 SSNs constructed from the same sequences used in the Class I  $\alpha$  with Class II phylogeny showed the  
474 Cyano SP clade as being distinct from both Class I and Class II sequences (Fig. S4). Thus, the high  
475 divergence of the Cyano SP clade as compared to Class I  $\alpha$  and Class II sequences in the RNRdb are

476 likely contributing to the Cyano SP clade grouping with Class II sequences on the 70% tree. Given  
477 the presence of the tyrosine residues, the consistent grouping of the Cyano SP clade on the Class I  $\alpha$ -  
478 only trees, and the presence of the  $\beta$  subunit, we are confident in assigning the Cyano SP clade to  
479 Class I. A study of gene transcription in P-SSP7- infected *Prochlorococcus* cultures lends further  
480 experimental support for the presence of a Class I RNR in P-SSP7. Both the P-SSP7 Class I RNR  $\alpha$   
481 subunit (identified as nrd-020) and the neighboring  $\beta$  subunit (identified as nrd-021) were co-  
482 expressed during the second stage of phage infection, during which DNA replication typically takes  
483 place (Lindell et al., 2007).

484 Assignment of the P-SSP7 RNR to an existing Class I subclass was inconclusive as the  
485 radical-generating  $\beta$  subunit (Cotruvo et al., 2011) could not be clearly assigned based on conserved  
486 residues. While the P-SSP7  $\beta$  subunit contains all of the conserved residues required for function  
487 (Table 3), it lacks the tyrosine residue (Y122 in *E.coli*) that harbors the stable protein radical or is  
488 conserved in subclasses Ia, Ib, Id, and Ie (Blaesi et al., 2018; Cotruvo et al., 2013; Nordlund and  
489 Eklund, 1993) (Fig. 1b). Assignment also could not be made to subclass Ic, the only known subclass  
490 lacking the tyrosine residue (Högbom et al., 2004), based on the outcome of phylogenetic (Fig. 3 &  
491 Fig. S2) and protein SSN analysis (Fig. 4).

492 Additionally, we examined the metal-binding sites in the P-SSP7  $\beta$  subunit, as  
493 metallofactor identity is used to discriminate between subclasses Ia-Id (Cotruvo et al., 2011; Rose  
494 et al., 2018). The metal-binding residues for the P-SSP7 and other Cyano SP clade member  $\beta$   
495 subunits formed a different pattern than is seen in any of the RNRdb groups (Table 6). The  
496 combination of the unique metal-binding residues, the lack of a tyrosine residue on which to generate  
497 a protein radical, and the phylogenetic distance between the Cyano SP clade and subclass Ic  
498 (NrdBzc) sequences, suggest that the P-SSP7 Class I  $\beta$  subunit may constitute a novel subclass of  
499 Class I RNRs.

#### 500 4.4 Origin of the P-SSP7 RNR

501 Because P-SSP7's host, like most marine *Synechococcus* and *Prochlorococcus*, carries a  
502 Class II RNR, we were interested in the origin of the Class I RNR found in P-SSP7. The Class I  $\beta$   
503 subunit phylogenies inconsistently placed the Cyano SP clade. Examination of Class I  $\alpha$  subunit  
504 trees showed a consistent placement of the Cyano SP clade at the base of the branch harboring the  
505 RNRdb groups NrdAk (Ia presumed) and NrdAi (subclass Id) (Figs. 5 and S3). This is perhaps to be  
506 expected as, like the NrdAk and NrdAi groups, the Cyano SP Class I  $\alpha$  subunits do not contain ATP  
507 cone domains, a trait that is rare among Class I  $\alpha$  subunits (Jonna et al., 2015).

508 The observation that the Cyano SP clade does not have the same placement on the Class I  $\beta$ -  
509 only and Class I  $\alpha$ -only trees is highly unusual. In viruses and cellular organisms, Class I  $\alpha$  and  $\beta$   
510 subunits are thought to evolve as units (Dwivedi et al., 2013), producing trees with the same patterns  
511 (Lundin et al., 2010). However, viral genomes are known to be highly modular, consisting of genes  
512 from multiple sources (Iranzo et al., 2016; Krupovic et al., 2018). It seems possible that an ancestral  
513 phage of the Cyano SP clade incorporated the Class I  $\alpha$  and  $\beta$  subunits separately. Given that Class I  
514  $\alpha$  and  $\beta$  subunits can only perform ribonucleotide reduction as a unit, i.e. both subunits are required  
515 for functionality, these acquisitions would have had to occur in quick succession to avoid loss by the  
516 phage. Perhaps in support of this hypothesis is that the Cyano SP  $\beta$  subunits sometimes cluster with  
517 the NrdBg group (subclass Ia) which harbors the Cyano M clade, while the Cyano SP  $\alpha$  subunits  
518 consistently cluster with the NrdAi group (subclass Id) that contains the *Synechococcus* phage  
519 S-TIM5. These phage groups (i.e. Cyano SP, S-TIM5, and Cyano M) all infect marine

520 *Synechococcus* and *Prochlorococcus*, making the possibility more likely that the Cyano SP RNRs are  
521 a mosaic of these cyanomyoviral groups, with the  $\alpha$  subunit having been acquired from a cyanophage  
522 related to S-TIM5 and the  $\beta$  subunit from a member of the Cyano M clade.

523 A phylogeny constructed using all Cyanobacteria and cyanophage present in the RNRdb with  
524 the Cyano SP clade shows the Cyano SP clade on the Class I side of the tree, distinct from the Class  
525 II RNRs (Fig. 6). This phylogeny demonstrates that the majority of known cyanophage carry Class I  
526 RNRs. The *Synechococcus* or *Prochlorococcus* hosts of phages in the Cyano M, Cyano SP clades,  
527 *Synechococcus* phage S-TIM5, and the Cyanophage P60 clade all carry Class II RNRs (Chen and Lu,  
528 2002; Sabeji et al., 2012; Sakowski et al., 2014). Despite being a myovirus, S-TIM5 does not carry  
529 an RNR belonging to the Cyano M clade, likely because it is believed to represent a separate lineage  
530 of myoviruses (Sabeji et al., 2012). Interestingly, cyanosipho- and cyanopodoviruses were found in  
531 two widely separated clades. Lytic cyanosipho- and cyanopodoviruses within the Cyanophage P60  
532 RNR clade contain a Class II RNR, which is the same type carried by their hosts, whereas  
533 cyanosipho- and cyanopodoviruses in the Cyano SP clade contain a Class I RNR. The biological and  
534 ecological explanations behind this divergence are a mystery; however, prior work has indicated that  
535 cyanopodoviruses can be broadly divided into two clusters, MPP-A and MPP-B, based on whole  
536 genome analyses (Huang et al., 2015). Cyanopodoviruses within cluster MPP-B showed greater  
537 tendency to carry auxiliary photosynthesis genes, however, no single gene or gene group, including  
538 RNR, could clearly distinguish the two clusters. Nevertheless, RNRs belonging to the Cyano SP  
539 clade seem to be more common among cyanosipho- and cyanopodoviruses (Huang et al., 2015;  
540 Sakowski et al., 2014). Whether carrying a Class II RNR is the ancestral state of cyanosipho- and  
541 cyanopodoviruses could not be determined from our phylogenies.

542 The use of marker genes such as RNR in studying viral ecology is important in connecting  
543 genomic information to phenotypic traits. However, correct annotation of these genes is essential if  
544 accurate information is to be gained. The reannotation also means that most marine cyanophage  
545 carry RNRs that did not come from their hosts (Fig. 6), which has implications for our understanding  
546 about the acquisition of nucleotide metabolism genes by viruses. That Cyano SP clade members  
547 carry Class I RNRs and have lost the tyrosyl radical site in the  $\beta$  subunit is also a reminder that  
548 viruses have to adapt to the intracellular environment as well as the extracellular environment.  
549 Finally, the discovery of an overlooked  $\beta$  subunit implies that some unknown viral gene space may  
550 be composed of known genes that are too divergent for similarity-based annotation methods to detect  
551 but can still be identified by other means.

## 552 **5 Conflict of Interest**

553 The authors declare that the research was conducted in the absence of any commercial or financial  
554 relationships that could be construed as a potential conflict of interest.

## 555 **6 Author Contributions**

556 AH did the analysis and wrote the manuscript. RM created the sequence similarity networks,  
557 assisted with the analysis, and edited the manuscript. KW and SP contributed to study design, data  
558 interpretation, and manuscript preparation. All authors read and approved the final manuscript.

## 559 **7 Funding**

560 This work was supported by the National Science Foundation Office of Integrated Activities, grant  
561 number 1736030 and the National Science Foundation Division of Biological Infrastructure, grant

562 number 1356374. Computational support by the Univ. of Delaware Center for Bioinformatics and  
563 Computational Biology Core Facility was made possible by funding from Delaware INBRE (NIH  
564 P20 GM103446) and the Delaware Biotechnology Institute.

## 565 **8 Acknowledgments**

566 We would like to thank Barbra D. Ferrell for critical reading and input on the manuscript.

## 567 **9 Data Availability Statement**

568 The datasets analyzed for this study can be found in the RNRdb (<http://rnrdp.pfitmap.org/>).  
569 Accession numbers for the Cyano SP clade, including genome accession, can be found in the  
570 supplemental material. The supplemental material also contains accession numbers for the annotated  
571 RNR subclass representatives.

## 572 **10 References**

- 573 Ahmad, M. F., Singh Kaushal, P., Wan, Q., Wijerathna, S. R., An, X., Huang, M., et al. (2012). Role  
574 of Arginine 293 and Glutamine 288 in Communication between Catalytic and Allosteric Sites in  
575 Yeast Ribonucleotide Reductase. *J. Mol. Biol.* 419, 315–329. doi:10.1016/j.jmb.2012.03.014.
- 576 Aravind, L., Wolf, Y. I., and Koonin, E. V (2000). The ATP-Cone: An Evolutionarily Mobile, ATP-  
577 Binding Regulatory Domain. *J. Mol. Microbiol. Biotechnol* 301, 191–194.
- 578 Baldwin, J., Krebs, C., Ley, B. A., Edmondson, D. E., Huynh, B. H., and Bollinger Jr., J. M. (2000).  
579 Mechanism of Rapid Electron Transfer during Oxygen Activation in the R2 Subunit of  
580 Escherichia coli Ribonucleotide Reductase. 1. Evidence for a Transient Tryptophan Radical. *J.*  
581 *Am. Chem. Soc.* 122, 12195–12206. doi:10.1021/JA001278U.
- 582 Barnett, J. P., Scanlan, D. J., and Blindauer, C. A. (2012). Fractionation and identification of  
583 metalloproteins from a marine cyanobacterium. *Anal Bioanal Chem* 402, 3371–3377.  
584 doi:10.1007/s00216-011-5708-6.
- 585 Berggren, G., Lundin, D., and Sjöberg, B.-M. (2017). “Assembly of Dimanganese and  
586 Heterometallic Manganese Proteins,” in *Encyclopedia of Inorganic and Bioinorganic*  
587 *Chemistry*, ed. R. A. Scott (John Wiley & Sons, Ltd.). doi:10.1002/9781119951438.eibc2480.
- 588 Blaesi, E. J., Palowitch, G. M., Hu, K., Kim, A. J., Rose, H. R., Alapati, R., et al. (2018). Metal-free  
589 class Ie ribonucleotide reductase from pathogens initiates catalysis with a tyrosine-derived  
590 dihydroxyphenylalanine radical. *Proc. Natl. Acad. Sci. U. S. A.*, 201811993.  
591 doi:10.1073/pnas.1811993115.
- 592 Blakley, R. L., and Barker, H. A. (1964). Cobamide stimulation of the reduction of ribotides to  
593 deoxyribotides in *Lactobacillus leichmanii*. *Biochem. Biophys. Res. Commun.* 16, 391–397.
- 594 Booker, S., Licht, S., Broderick, J., and Stubbe, J. (1994). Coenzyme B 12-Dependent  
595 Ribonucleotide Reductase: Evidence for the Participation of Five Cysteine Residues in  
596 Ribonucleotide Reduction. *Biochemistry* 33, 12676–12685.
- 597 Brown, N. C., and Reichard, P. (1969). Role of effector binding in allosteric control of

- 598 ribonucleoside diphosphate reductase. *J. Mol. Biol.* 46, 39–55. doi:10.1016/0022-  
599 2836(69)90056-4.
- 600 Browning, T. J., Achterberg, E. P., Rapp, I., Engel, A., Bertrand, E. M., Tagliabue, A., et al. (2017).  
601 Nutrient co-limitation at the boundary of an oceanic gyre. *Nature* 551, 242–246.  
602 doi:10.1038/nature24063.
- 603 Brum, J. R., Ignacio-Espinoza, J. C., Roux, S., Doucier, G., Acinas, S. G., Alberti, A., et al. (2015).  
604 Patterns and ecological drivers of ocean viral communities. *Science*. 348.
- 605 Chen, F., and Lu, J. (2002). Genomic Sequence and Evolution of Marine Cyanophage P60: a New  
606 Insight on Lytic and Lysogenic Phages. *Appl. Environ. Microbiol.* 68, 2589–2594.  
607 doi:10.1128/AEM.68.5.2589-2594.2002.
- 608 Chen, F., Wang, K., Huang, S., Cai, H., Zhao, M., Jiao, N., et al. (2009). Diverse and dynamic  
609 populations of cyanobacterial podoviruses in the Chesapeake Bay unveiled through DNA  
610 polymerase gene sequences. *Environ. Microbiol.* 11, 2884–2892. doi:10.1111/j.1462-  
611 2920.2009.02033.x.
- 612 Chopyk, J., Allard, S., Nasko, D. J., Bui, A., Mongodin, E. F., and Sapkota, A. R. (2018).  
613 Agricultural Freshwater Pond Supports Diverse and Dynamic Bacterial and Viral Populations.  
614 9, 1–14. doi:10.3389/fmicb.2018.00792.
- 615 Climent, I., Sjöberg, B. M., and Huang, C. Y. (1992). Site-directed mutagenesis and deletion of the  
616 carboxyl terminus of *Escherichia coli* ribonucleotide reductase protein R2. Effects on catalytic  
617 activity and subunit interaction. *Biochemistry* 31, 4801–4807. doi:10.1021/bi00135a009.
- 618 Cotruvo, J. A., Stich, T. A., Britt, R. D., Stubbe, J., and Stubbe, J. (2013). Mechanism of assembly of  
619 the dimanganese-tyrosyl radical cofactor of class Ib ribonucleotide reductase: enzymatic  
620 generation of superoxide is required for tyrosine oxidation via a Mn(III)Mn(IV) intermediate. *J.*  
621 *Am. Chem. Soc.* 135, 4027–4039. doi:10.1021/ja312457t.
- 622 Cotruvo, J. A., Stubbe, J., and Stubbe, J. (2011). Class I Ribonucleotide Reductases: Metallocofactor  
623 Assembly and Repair In Vitro and In Vivo. *Annu. Rev. Biochem.* 80, 733–767.  
624 doi:10.1146/annurev-biochem-061408-095817.
- 625 Coutinho, F. H., Silveira, C. B., Gregoracci, G. B., Thompson, C. C., Edwards, R. A., Brussaard, C.  
626 P. D., et al. (2017). Marine viruses discovered via metagenomics shed light on viral strategies  
627 throughout the oceans. *Nat. Commun.* 8, 15955. doi:10.1038/ncomms15955.
- 628 Dassama, L. M. K., Boal, A. K., Krebs, C., Rosenzweig, A. C., Bollinger, J. M., and Jr. (2012).  
629 Evidence that the  $\beta$  subunit of *Chlamydia trachomatis* ribonucleotide reductase is active with  
630 the manganese ion of its manganese(IV)/iron(III) cofactor in site 1. *J. Am. Chem. Soc.* 134,  
631 2520–2523. doi:10.1021/ja211314p.
- 632 Dolja, V. V., and Koonin, E. V. (2018). Metagenomics reshapes the concepts of RNA virus evolution  
633 by revealing extensive horizontal virus transfer. *Virus Res.* 244, 36–52.  
634 doi:10.1016/J.VIRUSRES.2017.10.020.
- 635 Dwivedi, B., Xue, B., Lundin, D., Edwards, R. a, and Breitbart, M. (2013). A bioinformatic analysis

- 636 of ribonucleotide reductase genes in phage genomes and metagenomes. *BMC Evol. Biol.* 13, 33.  
637 doi:10.1186/1471-2148-13-33.
- 638 Eiserich, J. P., Butler, J., van der Vliet, A., Cross, C. E., and Halliwell, B. (1995). Nitric oxide  
639 rapidly scavenges tyrosine and tryptophan radicals. *Biochem. J.* 310 ( Pt 3), 745–9.
- 640 Eklund, H., Uhlin, U., Färnegårdh, M., Logan, D. T., and Nordlund, P. (2001). Structure and function  
641 of the radical enzyme ribonucleotide reductase. *Prog. Biophys. Mol. Biol.* 77, 177–268.  
642 doi:10.1016/S0079-6107(01)00014-1.
- 643 Eliasson, R., Pontiss, E., Fontecaves, M., Gereqz, C., Harder\$, J., Jornvallll, H., et al. (1992).  
644 Characterization of Components of the Anaerobic Ribonucleotide Reductase System from  
645 *Escherichia coli*. *J. Biol. Chem.* 267, 25541–25547.
- 646 Eriksson, M., Jordan, A., and Eklund, H. (1998). Structure of *Salmonella typhimurium* nrdF  
647 Ribonucleotide Reductase in Its Oxidized and Reduced Forms. *Biochemistry* 37, 13359–13369.
- 648 Eriksson, M., Uhlin, U., Ramaswamy, S., Ekberg, M., Regnström, K., Sjöberg, B.-M., et al. (1997).  
649 Binding of allosteric effectors to ribonucleotide reductase protein R1: reduction of active-site  
650 cysteines promotes substrate binding. *Structure* 5, 1077–1092. doi:10.1016/S0969-  
651 2126(97)00259-1.
- 652 Fontecave, M., Mulliez, E., and Logan, D. T. (2002). Deoxyribonucleotide synthesis in anaerobic  
653 microorganisms: the class III ribonucleotide reductase. *Prog. Nucleic Acid Res. Mol. Biol.* 72,  
654 95–127.
- 655 Fu, L., Niu, B., Zhu, Z., Wu, S., and Li, W. (2012). CD-HIT: accelerated for clustering the next-  
656 generation sequencing data. *Bioinformatics* 28, 3150–3152. doi:10.1093/bioinformatics/bts565.
- 657 Gerlt, J. A., Bouvier, J. T., Davidson, D. B., Imker, H. J., Sadkhin, B., Slater, D. R., et al. (2015).  
658 Enzyme Function Initiative-Enzyme Similarity Tool (EFI-EST): A web tool for generating  
659 protein sequence similarity networks. *Biochim. Biophys. Acta* 1854, 1019–1037.  
660 doi:10.1016/j.bbapap.2015.04.015.
- 661 Gogarten, J. P., Senejani, A. G., Zhaxybayeva, O., Olendzenski, L., and Hilario, E. (2002). Inteins:  
662 Structure, Function, and Evolution. *Annu. Rev. Microbiol* 56, 263–287.  
663 doi:10.1146/annurev.micro.56.012302.160741.
- 664 González, P. J., Correia, C., Moura, I., Brondino, C. D., and Moura, J. J. G. (2006). Bacterial nitrate  
665 reductases: Molecular and biological aspects of nitrate reduction. *J. Inorg. Biochem.* 100, 1015–  
666 1023. doi:10.1016/J.JINORGBIO.2005.11.024.
- 667 Greene, B. L., Taguchi, A. T., Stubbe, J., and Nocera, D. G. (2017). Conformationally Dynamic  
668 Radical Transfer within Ribonucleotide Reductase. *J. Am. Chem. Soc.* 139, 16657–16665.  
669 doi:10.1021/jacs.7b08192.
- 670 Guerrero, M. G. (1985). Assimilatory nitrate reduction. *Tech. Bioprod. Photosynth.*, 165–172.  
671 doi:10.1016/B978-0-08-031999-5.50023-6.
- 672 Hawco, N. J., and Saito, M. A. (2018). Competitive inhibition of cobalt uptake by zinc and



- 673 manganese in a pacific *Prochlorococcus* strain: Insights into metal homeostasis in a streamlined  
674 oligotrophic cyanobacterium. *Limnol. Oceanogr.* doi:10.1002/lno.10935.
- 675 Heal, K. R., Qin, W., Ribalet, F., Bertagnolli, A. D., Coyote-Maestas, W., Hmelo, L. R., et al. (2016).  
676 Two distinct pools of B 12 analogs reveal community interdependencies in the ocean. *Proc.*  
677 *Nati. Acad. Sci. USA* 114, 364–369. doi:10.1073/pnas.1608462114.
- 678 Helliwell, K. E., Lawrence, A. D., Holzer, A., Scanlan, D. J., Warren, M. J., and Smith, A. G. (2016).  
679 Cyanobacteria and Eukaryotic Algae Use Different Chemical Variants of Vitamin B 12. *Curr.*  
680 *Biol.* 26, 999–1008. doi:10.1016/j.cub.2016.02.041.
- 681 Herrick, J., and Sclavi, B. (2007). Ribonucleotide reductase and the regulation of DNA replication:  
682 an old story and an ancient heritage. *Mol. Microbiol.* 63, 22–34. doi:10.1111/j.1365-  
683 2958.2006.05493.x.
- 684 Högbom, M., Stenmark, P., Voevodskaya, N., McClarty, G., Gräslund, A., and Nordlund, P. (2004).  
685 The Radical Site in Chlamydial Ribonucleotide Reductase Defines a New R2 Subclass. *Science.*  
686 305, 245–248.
- 687 Huang, S., Zhang, S., Jiao, N., and Chen, F. (2015). Comparative genomic and phylogenomic  
688 analyses reveal a conserved core genome shared by estuarine and oceanic cyanopodoviruses.  
689 *PLoS One* 10, e0142962. doi:10.1371/journal.pone.0142962.
- 690 Huertas, M. J., López-Maury, L., Giner-Lamia, J., Sánchez-Riego, A. M., and Florencio, F. J. (2014).  
691 Metals in Cyanobacteria: analysis of the copper, nickel, cobalt and arsenic homeostasis  
692 mechanisms. *Life* 4, 865–86. doi:10.3390/life4040865.
- 693 Iranzo, J., Krupovic, M., and Koonin, E. V. (2016). The double-stranded DNA virosphere as a  
694 modular hierarchical network of gene sharing. *MBio* 7, 1–21. doi:10.1128/mBio.00978-16.
- 695 Jiang, W., Yun, D., Saleh, L., Barr, E., Xing, G., Hoffart, L. M., et al. (2007). A manganese (IV)/iron  
696 (III) cofactor in *Chlamydia trachomatis* ribonucleotide reductase. *Science.* 316, 1188–1191.  
697 doi:10.1126/science.1141179.
- 698 Jonna, V. R., Crona, M., Rofougaran, R., Lundin, D., Johansson, S., Brännström, K., et al. (2015).  
699 Diversity in Overall Activity Regulation of Ribonucleotide Reductase. *J. Biol. Chem.* 290,  
700 17339–48. doi:10.1074/jbc.M115.649624.
- 701 Jordan, A., and Reichard, P. (1998). Ribonucleotide Reductases. *Annu. Rev. Biochem.* 67, 71–98.  
702 doi:10.1146/annurev.biochem.75.103004.142443.
- 703 Jover, L. F., Effler, T. C., Buchan, A., Wilhelm, S. W., and Weitz, J. S. (2014). The elemental  
704 composition of virus particles: implications for marine biogeochemical cycles. *Nat. Rev.*  
705 *Microbiol.* 12, 519–528. doi:10.1038/nrmicro3289.
- 706 Kasrayan, A., Persson, A. L., Sahlin, M., and Sjöberg, B. M. (2002). The conserved active site  
707 asparagine in class I ribonucleotide reductase is essential for catalysis. *J. Biol. Chem.* 277,  
708 5749–5755. doi:10.1074/jbc.M106538200.
- 709 Katoh, K., and Standley, D. M. (2013). MAFFT Multiple Sequence Alignment Software Version 7:

- 710 Improvements in Performance and Usability. *Mol. Biol. Evol.* 30, 772–780.  
711 doi:10.1093/molbev/mst010.
- 712 Kazlauskas, D., Krupovic, M., and Venclovas, Č. (2016). The logic of DNA replication in double-  
713 stranded DNA viruses: insights from global analysis of viral genomes. *Nucleic Acids Res* 44,  
714 4551–4564. doi:10.1093/nar/gkw322.
- 715 Keren, N., Aurora, R., and Pakrasi, H. B. (2004). Critical roles of bacterioferritins in iron storage and  
716 proliferation of Cyanobacteria. *Plant Physiol.* 135, 1666–73. doi:10.1104/pp.104.042770.
- 717 Keren, N., Kidd, M. J., Penner-Hahn, J. E., and Pakrasi, H. B. (2002). A Light-Dependent  
718 Mechanism for Massive Accumulation of Manganese in the Photosynthetic Bacterium  
719 *Synechocystis* sp. PCC 6803 †. *Biochemistry* 41, 15085–15092. doi:10.1021/bi026892s.
- 720 King, D. S., and Reichard, P. (1995). Mass Spectrometric Determination of the Radical Scission Site  
721 in the Anaerobic Ribonucleotide Reductase of *Escherichia coli*. *Biochem. Biophys. Res.*  
722 *Commun.* 206, 731–735. doi:10.1006/BBRC.1995.1103.
- 723 Klotz, A., Reinhold, E., Doello, S., Forchhammer, K., Klotz, A., Reinhold, E., et al. (2015). Nitrogen  
724 Starvation Acclimation in *Synechococcus elongatus*: Redox-Control and the Role of Nitrate  
725 Reduction as an Electron Sink. *Life* 5, 888–904. doi:10.3390/life5010888.
- 726 Kolberg, M., Strand, K. R., Graff, P., and Andersson, K. K. (2004). Structure, function, and  
727 mechanism of ribonucleotide reductases. *Biochim. Biophys. Acta - Proteins Proteomics* 1699,  
728 1–34. doi:10.1016/j.bbapap.2004.02.007.
- 729 Krebs, C., Chen, S., Baldwin, J., Ley, B. A., Patel, U., Edmondson, D. E., et al. (2000). Mechanism  
730 of Rapid Electron Transfer during Oxygen Activation in the R2 Subunit of *Escherichia coli*  
731 Ribonucleotide Reductase. 2. Evidence for and Consequences of Blocked Electron Transfer in  
732 the W48F Variant. *J. Am. Chem. Soc.* 122, 12207–12219. doi:10.1021/JA001279M.
- 733 Krishnamurthy, S. R., and Wang, D. (2017). Origins and challenges of viral dark matter. *Virus Res.*  
734 239, 136–142. doi:10.1016/J.VIRUSRES.2017.02.002.
- 735 Krupovic, M., Cvirkaite-Krupovic, V., Iranzo, J., Prangishvili, D., and Koonin, E. V. (2018). Viruses  
736 of archaea: Structural, functional, environmental and evolutionary genomics. *Virus Res.* 244,  
737 181–193. doi:10.1016/J.VIRUSRES.2017.11.025.
- 738 Laber, C. P., Hunter, J. E., Carvalho, F., Collins, J. R., Hunter, E. J., Schieler, B. M., et al. (2018).  
739 Coccolithovirus facilitation of carbon export in the North Atlantic. *Nat. Microbiol.* 3, 537–547.  
740 doi:10.1038/s41564-018-0128-4.
- 741 Larsson, A., and Sjöberg, B. M. (1986). Identification of the stable free radical tyrosine residue in  
742 ribonucleotide reductase. *EMBO J.* 5, 2037–2040. doi:10.1002/J.1460-2075.1986.TB04461.X.
- 743 Larsson, K.-M., Jordan, A., Eliasson, R., Reichard, P., Logan, D. T., and Nordlund, P. (2004).  
744 Structural mechanism of allosteric substrate specificity regulation in a ribonucleotide reductase.  
745 *Nat. Struct. Mol. Biol.* 11, 1142–9. doi:10.1038/nsmb838.
- 746 Li, W., and Godzik, A. (2006). CD-HIT: a fast program for clustering and comparing large sets of

- 747 protein or nucleotide sequences. *Bioinformatics* 22, 1658–1659.  
748 doi:10.1093/bioinformatics/btl158.
- 749 Licht, S., Gerfen, G. J., and Stubbe, J. (1996). Thiyl Radicals in Ribonucleotide Reductases. *Science*.  
750 271, 477–481. doi:10.1126/science.271.5248.477.
- 751 Lin, A.-N. I., Ashley, G. W., and Stubbe, J. A. (1987). Location of the Redox-Active Thiols of  
752 Ribonucleotide Reductase: Sequence Similarity between the *Escherichia coli* and *Lactobacillus*  
753 *leichmannii* Enzymes. *Biochemistry* 26, 6905–6909.
- 754 Lindell, D., Jaffe, J. D., Coleman, M. L., Futschik, M. E., Axmann, I. M., Rector, T., et al. (2007).  
755 Genome-wide expression dynamics of a marine virus and host reveal features of co-evolution.  
756 *Nature* 449, 83–86. doi:10.1038/nature06130.
- 757 Lindell, D., Jaffe, J. D., Johnson, Z. I., Church, G. M., and Chisholm, S. W. (2005). Photosynthesis  
758 genes in marine viruses yield proteins during host infection. *Nature* 438, 86–89.  
759 doi:10.1038/nature04111.
- 760 Lindell, D., Sullivan, M. B., Johnson, Z. I., Tolonen, A. C., Rohwer, F., and Chisholm, S. W. (2004).  
761 Transfer of photosynthesis genes to and from *Prochlorococcus* viruses. *Proc. Natl. Acad. Sci. U.*  
762 *S. A.* 101, 11013–8. doi:10.1073/pnas.0401526101.
- 763 Logan, D. T., Andersson, J., Sjöberg, B.-M., and Nordlund, P. (1999). A Glycyl Radical Site in the  
764 Crystal Structure of a Class III Ribonucleotide Reductase. *Science*. 283, 1499–1504.  
765 doi:10.1126/science.283.5407.1499.
- 766 Lundin, D., Berggren, G., Logan, D. T., and Sjöberg, B.-M. (2015). The Origin and Evolution of  
767 Ribonucleotide Reduction. *Life* 5, 604–636. doi:10.3390/life5010604.
- 768 Lundin, D., Gribaldo, S., Torrents, E., Sjöberg, B.-M., and Poole, A. M. (2010). Ribonucleotide  
769 reduction - horizontal transfer of a required function spans all three domains. *BMC Evol. Biol.*  
770 10, 383. doi:10.1186/1471-2148-10-383.
- 771 Lundin, D., Torrents, E., Poole, A. M., and Sjöberg, B.-M. (2009). RNRdb, a curated database of the  
772 universal enzyme family ribonucleotide reductase, reveals a high level of misannotation in  
773 sequences deposited to Genbank. *BMC Genomics* 10, 589. doi:10.1186/1471-2164-10-589.
- 774 Mao, S. S., Holler, T. P., Yu, G. X., Bollinger, J. M., Booker, S., Johnston, M. I., et al. (1992a). A  
775 Model for the Role of Multiple Cysteine Residues Involved in Ribonucleotide Reduction:  
776 Amazing and Still Confusing. *Biochemistry*. doi:10.1021/bi00155a029.
- 777 Mao, S. S., Yu, G. X., Chalfoun, D., and Stubbe, J. (1992b). Characterization of C439SR1, a Mutant  
778 of *Escherichia coli* Ribonucleotide Diphosphate Reductase: Evidence That C439 Is a Residue  
779 Essential for Nucleotide Reduction and C439SR1 Is a Protein Possessing Novel Thioredoxin-  
780 like Activity. *Biochemistry* 31, 9752–9759.
- 781 Marchler-Bauer, A., Bo, Y., Han, L., He, J., Lanczycki, C. J., Lu, S., et al. (2017). CDD/SPARCLE:  
782 functional classification of proteins via subfamily domain architectures. *Nucleic Acids Res.* 45,  
783 D200–D203. doi:10.1093/nar/gkw1129.

- 784 Mathews, C. K. (2006). DNA precursor metabolism and genomic stability. *FASEB J.* 5, 1300–1314.  
785 doi:10.1096/fj.06-5730rev.
- 786 Moniruzzaman, M., Wurch, L. L., Alexander, H., Dyhrman, S. T., Gobler, C. J., and Wilhelm, S. W.  
787 (2017). Virus-host relationships of marine single-celled eukaryotes resolved from  
788 metatranscriptomics. *Nat. Commun.* 8, 16054. doi:10.1038/ncomms16054.
- 789 Moore, C. M., Mills, M. M., Arrigo, K. R., Berman-Frank, I., Bopp, L., Boyd, P. W., et al. (2013).  
790 Processes and patterns of oceanic nutrient limitation. *Nat. Geosci.* 6, 701–710.  
791 doi:10.1038/ngeo1765.
- 792 Moore, R. M., Harrison, A. O., McAllister, S. M., and Wommack, K. E. (2018). Iroki: automatic  
793 customization and visualization of phylogenetic trees. *bioRxiv*. doi:10.1101/106138.
- 794 Mowa, M. B., Warner, D. F., Kaplan, G., Kana, B. D., and Mizrahi, V. (2009). Function and  
795 regulation of class I ribonucleotide reductase-encoding genes in mycobacteria. *J. Bacteriol.* 191,  
796 985–95. doi:10.1128/JB.01409-08.
- 797 Mulliez, E., Fontecave, M., Gaillard, J., and Reichard, P. (1993). An iron-sulfur center and a free  
798 radical in the active anaerobic ribonucleotide reductase of *Escherichia coli*. *J. Biol. Chem.* 268,  
799 2296–9.
- 800 Nordlund, P., and Eklund, H. (1993). Structure and function of the *Escherichia coli* ribonucleotide  
801 reductase protein R2. *J. Mol. Biol.* 232, 123–164.
- 802 Nordlund, P., and Reichard, P. (2006). Ribonucleotide Reductases. *Annu. Rev. Biochem.* 75, 681–  
803 706. doi:10.1146/annurev.biochem.75.103004.142443.
- 804 Ormö Mats (1995). Residues important for radical stability in ribonucleotide reductase from  
805 *Escherichia coli*. *J. Biol. Chem.* 270, 6570–6576.
- 806 Palenik, B., Brahamsha, B., Larimer, F. W., Land, M., Hauser, L., Chain, P., et al. (2003). The  
807 genome of a motile marine *Synechococcus*. *Nature* 424, 1037–1042. doi:10.1038/nature01943.
- 808 Pérez, A. A., Rodionov, D. A., Bryant, D. A., Perez, A. A., Rodionov, D. A., Bryant, D. A., et al.  
809 (2016). Identification and Regulation of Genes for Cobalamin Transport in the Cyanobacterium  
810 *Synechococcus* sp. Strain PCC 7002. *J. Bacteriol.* 198, 2753–2761. doi:10.1128/JB.00476-16.
- 811 Perler, F. B., Olsen, G. J., and Adam, E. (1997). Compilation and analysis of intein sequences.  
812 *Nucleic Acids Res.* 25, 1087–1093.
- 813 Persson, A. L., Eriksson, M., Katterle, B., Pö, S., Sahlin, M., and Sjö, B.-M. (1997). A New  
814 Mechanism-based Radical Intermediate in a Mutant R1 Protein Affecting the Catalytically  
815 Essential Glu 441 in *Escherichia coli* Ribonucleotide Reductase. *The J. Biol. Chem.* 272,  
816 31533–31541.
- 817 Preimesberger, M. R., Johnson, E. A., Nye, D. B., and Lecomte, J. T. J. (2017). Covalent attachment  
818 of the heme to *Synechococcus* hemoglobin alters its reactivity toward nitric oxide. *J. Inorg.*  
819 *Biochem.* 177, 171–182. doi:10.1016/J.JINORGBIO.2017.09.018.

- 820 Price, M. N., Dehal, P. S., and Arkin, A. P. (2010). FastTree 2 – Approximately Maximum-  
821 Likelihood Trees for Large Alignments. *PLoS One* 5, e9490. doi:10.1371/journal.pone.0009490.
- 822 Puxty, R. J., Millard, A. D., Evans, D. J., and Scanlan, D. J. (2016). Viruses Inhibit CO<sub>2</sub> Fixation in  
823 the Most Abundant Phototrophs on Earth. *Curr. Biol.* 26, 1585–1589.  
824 doi:10.1016/j.cub.2016.04.036.
- 825 Radi, R. (2004). Nitric oxide, oxidants, and protein tyrosine nitration. *Proc. Natl. Acad. Sci.* 101,  
826 4003–4008. doi:10.1073/pnas.0307446101.
- 827 Rastelli, E., Corinaldesi, C., Dell’Anno, A., Tangherlini, M., Martorelli, E., Ingrassia, M., et al.  
828 (2017). High potential for temperate viruses to drive carbon cycling in chemoautotrophy-  
829 dominated shallow-water hydrothermal vents. *Environ. Microbiol.* 19, 4432–4446.  
830 doi:10.1111/1462-2920.13890.
- 831 Reichard, P. (1993). From RNA to DNA, Why So Many Ribonucleotide Reductases? *Science.* 260,  
832 1773–1777.
- 833 Rodionov, D. A., Vitreschak, A. G., Mironov, A. A., and Gelfand, M. S. (2003). Comparative  
834 genomics of the vitamin B<sub>12</sub> metabolism and regulation in prokaryotes. *J. Biol. Chem.* 278,  
835 41148–59. doi:10.1074/jbc.M305837200.
- 836 Rose, H. R., Ghosh, M. K., Maggiolo, A. O., Pollock, C. J., Blaes, E. J., Hajj, V., et al. (2018).  
837 Structural Basis for Superoxide Activation of Flavobacterium johnsoniae Class I Ribonucleotide  
838 Reductase and for Radical Initiation by Its Dimanganese Cofactor. *Biochemistry* 57, 2679–2693.  
839 doi:10.1021/acs.biochem.8b00247.
- 840 Roux, S., Brum, J. R., Dutilh, B. E., Sunagawa, S., Duhaime, M. B., Loy, A., et al. (2016).  
841 Ecogenomics and potential biogeochemical impacts of globally abundant ocean viruses. *Nature*  
842 537, 689–693. doi:10.1038/nature19366.
- 843 Rova, U., Adrait, A., Pötsch, S., Gräslund, A., and Thelander, L. (1999). Evidence by mutagenesis  
844 that Tyr(370) of the mouse ribonucleotide reductase R2 protein is the connecting link in the  
845 intersubunit radical transfer pathway. *J. Biol. Chem.* 274, 23746–51.  
846 doi:10.1074/JBC.274.34.23746.
- 847 Rozman Grinberg, I., Lundin, D., Hasan, M., Crona, M., Jonna, V. R., Loderer, C., et al. (2018a).  
848 Novel ATP-cone-driven allosteric regulation of ribonucleotide reductase via the radical-  
849 generating subunit. *Elife* 7, e31529. doi:10.7554/eLife.31529.
- 850 Rozman Grinberg, I., Lundin, D., Sahlin, M., Crona, M., Berggren, G., Hofer, A., et al. (2018b). A  
851 glutaredoxin domain fused to the radical-generating subunit of ribonucleotide reductase (RNR)  
852 functions as an efficient RNR reductant. *J. Biol. Chem.* 293, 15889–15900.  
853 doi:10.1074/jbc.RA118.004991.
- 854 Sabehi, G., Shaulov, L., Silver, D. H., Yanai, I., Harel, A., and Lindell, D. (2012). A novel lineage of  
855 myoviruses infecting cyanobacteria is widespread in the oceans. *Proc. Natl. Acad. Sci. U. S. A.*  
856 109, 2037–42. doi:10.1073/pnas.1115467109.
- 857 Sakowski, E. G., Munsell, E. V, Hyatt, M., Kress, W., Williamson, S. J., Nasko, D. J., et al. (2014).

- 858 Ribonucleotide reductases reveal novel viral diversity and predict biological and ecological  
859 features of unknown marine viruses. *Proc. Natl. Acad. Sci. U. S. A.* 111, 15786–91.  
860 doi:10.1073/pnas.1401322111.
- 861 Schmidt, H. F., Sakowski, E. G., Williamson, S. J., Polson, S. W., and Wommack, K. E. (2014).  
862 Shotgun metagenomics indicates novel family A DNA polymerases predominate within marine  
863 viroplankton. *ISME J.* 8, 103–114. doi:10.1038/ismej.2013.124.
- 864 Shannon, P., Markiel, A., Ozier, O., Baliga, N. S., Wang, J. T., Ramage, D., et al. (2003). Cytoscape:  
865 A Software Environment for Integrated Models of Biomolecular Interaction Networks. *Genome*  
866 *Res.* 13, 2498–2504. doi:10.1101/gr.1239303.
- 867 Shcolnick, S., and Keren, N. (2006). Metal homeostasis in cyanobacteria and chloroplasts. Balancing  
868 benefits and risks to the photosynthetic apparatus. *Plant Physiol.* 141, 805–10.  
869 doi:10.1104/pp.106.079251.
- 870 Shestakov, S. V, and Karbysheva, E. A. (2017). The Origin and Evolution of Cyanobacteria. *Biol.*  
871 *Bull. Rev. Orig. Russ. Text © Uspekhi Sovrem. Biol.* 7, 259–272.  
872 doi:10.1134/S2079086417040090.
- 873 Sintchak, M. D., Arjara, G., Kellogg, B. A., Stubbe, J., and Drennan, C. L. (2002). The crystal  
874 structure of class II ribonucleotide reductase reveals how an allosterically regulated monomer  
875 mimics a dimer. *Nat. Struct. Biol.* 9, 293–300. doi:10.1038/nsb774.
- 876 Smoot, M. E., Ono, K., Ruscheinski, J., Wang, P.-L., and Ideker, T. (2011). Cytoscape 2.8: new  
877 features for data integration and network visualization. *Bioinformatics* 27, 431–432.  
878 doi:10.1093/bioinformatics/btq675.
- 879 Sullivan, M. B., Coleman, M. L., Weigele, P., Rohwer, F., and Chisholm, S. W. (2005). Three  
880 *Prochlorococcus* Cyanophage Genomes: Signature Features and Ecological Interpretations.  
881 *PLoS Biol.* 3, 790–806. doi:10.1371/journal.pbio.0030144.
- 882 Sunda, W. G., and Huntsman, S. A. (2015). High iron requirement for growth, photosynthesis, and  
883 low-light acclimation in the coastal cyanobacterium *Synechococcus bacillaris*. *Front. Microbiol.*  
884 6, 561. doi:10.3389/fmicb.2015.00561.
- 885 Suttle, C. A. (2005). Viruses in the sea. *Nature* 437, 356–361. doi:10.1038/nature04160.
- 886 Suttle, C. A. (2007). Marine viruses — major players in the global ecosystem. *Nat. Rev. Microbiol.* 5,  
887 801–812. doi:10.1038/nrmicro1750.
- 888 Suttle, C. A., and Chan, A. M. (1993). Marine cyanophages infecting oceanic and coastal strains of  
889 *Synechococcus*: abundance, morphology, cross-infectivity and growth characteristics. *Mar.*  
890 *Ecol. Prog. Ser.* 92, 99–109.
- 891 Tabor, S., and Richardson, C. C. (1987). DNA sequence analysis with a modified bacteriophage T7  
892 DNA polymerase. *Proc. Natl. Acad. Sci. U. S. A.* 84, 4767–71.
- 893 Tang, K., Jiao, N., Liu, K., Zhang, Y., and Li, S. (2012). Distribution and Functions of TonB-  
894 Dependent Transporters in Marine Bacteria and Environments: Implications for Dissolved

- 895 Organic Matter Utilization. *PLoS One* 7, e41204. doi:10.1371/journal.pone.0041204.
- 896 Tanioka, Y., Yabuta, Y., Yamaji, R., Shigeoka, S., Nakano, Y., Watanabe, F., et al. (2009).  
897 Occurrence of Pseudovitamin B 12 and Its Possible Function as the Cofactor of Cobalamin-  
898 Dependent Methionine Synthase in a Cyanobacterium *Synechocystis* sp. PCC6803. *J Nutr Sci*  
899 *Vitaminol* 55, 518–521.
- 900 Uhlin, U., and Eklund, H. (1994). Structure of ribonucleotide reductase protein R1. *Nature* 370, 533–  
901 539. doi:10.1038/370533a0.
- 902 Uppsten, M., Färnegårdh, M., Jordan, A., Eliasson, R., Eklund, H., and Uhlin, U. (2003). Structure of  
903 the Large Subunit of Class Ib Ribonucleotide Reductase from *Salmonella typhimurium* and its  
904 Complexes with Allosteric Effectors. *J. Mol. Biol.* 330, 87–97. doi:10.1016/S0022-  
905 2836(03)00538-2.
- 906 Wächtershäuser, G. (2006). From volcanic origins of chemoautotrophic life to Bacteria, Archaea and  
907 Eukarya. *Philos. Trans. R. Soc. B Biol. Sci.* 361, 1787–1806. doi:10.1098/rstb.2006.1904.
- 908 Waldron, K. J., Rutherford, J. C., Ford, D., and Robinson, N. J. (2009). Metalloproteins and metal  
909 sensing. *Nature* 460, 823–830. doi:10.1038/nature08300.
- 910 Wang, K., and Chen, F. (2008). Prevalence of highly host-specific cyanophages in the estuarine  
911 environment. *Environ. Microbiol.* 10, 300–312. doi:10.1111/j.1462-2920.2007.01452.x.
- 912 Warren, M. J., Raux, E., Schubert, H. L., and Escalante-Semerena, J. C. (2002). The biosynthesis of  
913 adenosylcobalamin (vitamin B 12 ). *Nat. Prod. Rep.* 19, 390–412. doi:10.1039/b108967f.
- 914

915 **Table 1.** Cyano SP clade reference sequences and their hosts.

| <b>Virus</b>                        | <b>Family</b>       | <b>Host</b>                                                  | <b>Host RNR type</b> |
|-------------------------------------|---------------------|--------------------------------------------------------------|----------------------|
| <i>Prochlorococcus</i> phage P-SSP7 | <i>Podoviridae</i>  | <i>Prochlorococcus marinus</i> subsp. pastoris str. CCMP1986 | II – monomeric       |
| Cyanophage P-SSP2                   | <i>Podoviridae</i>  | <i>P. marinus</i> MIT 9312                                   | II – monomeric       |
| Cyanophage 9515-10a                 | <i>Podoviridae</i>  | <i>P. marinus</i> MIT 9515                                   | II – monomeric       |
| Cyanophage NATL1A-7                 | <i>Podoviridae</i>  | <i>P. marinus</i> str. NATL1A-7                              | II – monomeric       |
| Cyanophage NATL2A-133               | <i>Podoviridae</i>  | <i>P. marinus</i> str. NATL2A-133                            | II – monomeric       |
| Cyanophage SS120-1                  | <i>Siphoviridae</i> | <i>P. marinus</i> SS120                                      | II – monomeric       |
| Cyanophage Syn5                     | <i>Podoviridae</i>  | <i>Synechococcus</i> str. WH8109                             | II – monomeric       |
| <i>Synechococcus</i> phage S-CBS4   | <i>Siphoviridae</i> | <i>Synechococcus</i> CB0101                                  | II – monomeric       |

916

917



918 **Table 2.** RNR subclass references used for alignment of putative  $\alpha$  and candidate  $\beta$  subunits and  
 919 curation of phylogenetic reference sequences.

| Class I $\alpha$ subunit representatives |                      |                                                                           |                           |                                 |                                               |
|------------------------------------------|----------------------|---------------------------------------------------------------------------|---------------------------|---------------------------------|-----------------------------------------------|
| Class                                    | Subtype/<br>Subclass | Species name                                                              | Crystal<br>structure<br>? | Crystal<br>structure<br>PDB* id | Reference                                     |
| I                                        | a                    | <i>Escherichia coli</i> str. K-12                                         | yes                       | 1RLR                            | (Uhlen and Eklund, 1994)                      |
|                                          | b                    | <i>Salmonella typhimurium</i><br>(strain LT2 / SGSC1412 /<br>ATCC 700720) | yes                       | 1PEU                            | (Uppsten et al., 2003)                        |
|                                          | c                    | <i>Chlamydia trachomatis</i> str.<br>D/UW-3/Cx                            | no                        | N/A                             | (Högbom et al., 2004)                         |
|                                          | d                    | <i>Flavobacterium johnsoniae</i>                                          | no                        | N/A                             | (Rose et al., 2018)                           |
|                                          | e                    | <i>Aerococcus urinae</i>                                                  | no                        | N/A                             | (Blaesi et al., 2018)                         |
| Class I $\beta$ subunit representatives  |                      |                                                                           |                           |                                 |                                               |
| Class                                    | Subclass             | Species name                                                              | Crystal<br>structure<br>? | Crystal<br>structure<br>PDB id* | Reference                                     |
| I                                        | a                    | <i>Escherichia coli</i> str. K-12                                         | yes                       | 1RIB                            | (Nordlund and Eklund, 1993)                   |
|                                          | b                    | <i>Salmonella typhimurium</i><br>(strain LT2 / SGSC1412 /<br>ATCC 700720) | yes                       | 1R2F                            | (Eriksson et al., 1998)                       |
|                                          | c                    | <i>Chlamydia trachomatis</i> str.<br>D/UW-3/Cx                            | yes                       | 1SYY;<br>4D8F                   | (Högbom et al., 2004); (Dassama et al., 2012) |
|                                          | d                    | <i>Flavobacterium johnsoniae</i>                                          | yes                       | 6CWO-P                          | (Rose et al., 2018)                           |

e                      *Aerococcus urinae*                      yes                      6EBO                      (Blaesi et al., 2018)

Class II Representatives

| <b>Class</b> | <b>Subclass</b> | <b>Species name</b>             | <b>Crystal structure ?</b> | <b>Crystal structure PDB id*</b> | <b>Reference</b>        |
|--------------|-----------------|---------------------------------|----------------------------|----------------------------------|-------------------------|
| II           | monomeric, RTPR | <i>Lactobacillus leichmanii</i> | yes                        | 1L1L                             | (Sintchak et al., 2002) |
|              | dimeric         | <i>Thermotoga maritima</i>      | yes                        | 3O0N                             | (Larsson et al., 2004)  |

920 \* PDB = Protein Data Bank

921

922 **Table 3.** Catalytic residues in Class I RNR  $\alpha$  and  $\beta$  subunits and their positions in the putative  $\alpha$  and  
 923  $\beta$  sequences from *Prochlorococcus* phage P-SSP7. Residues in **bold** were used in reference curation.

| RNR $\alpha$ subunit |                           |                                   |                              |                                              |
|----------------------|---------------------------|-----------------------------------|------------------------------|----------------------------------------------|
| <b>Residue</b>       | <b>Position in P-SSP7</b> | <b>Position in <i>E. coli</i></b> | <b>Function</b>              | <b>Citation</b>                              |
| <b>C</b>             | 32                        | 225                               | active site disulfide bridge | (Lin et al., 1987); (Booker et al., 1994)    |
| Q                    | 105R                      | 294                               | substrate specificity        | (Ahmad et al., 2012)                         |
| R                    | 110                       | 298                               | substrate specificity        | (Ahmad et al., 2012)                         |
| N                    | 187                       | 437                               | hydrogen bonds               | (Kasrayan et al., 2002)                      |
| <b>C</b>             | 189                       | 439                               | thiyl radical - abstracts H  | (Mao et al., 1992a); (Mao et al., 1992b)     |
| <b>E</b>             | 191                       | 441                               | hydrogen bonds               | (Persson et al., 1997)                       |
| <b>C</b>             | 200                       | 462                               | active site disulfide bridge | (Mao et al., 1992a)                          |
| <b>Y</b>             | 423                       | 730                               | radical transfer             | (Uhlen and Eklund, 1994)                     |
| <b>Y</b>             | 424                       | 731                               | radical transfer             | (Uhlen and Eklund, 1994)                     |
| <b>C</b>             | 464                       | 754                               | radical transfer             | (Lin et al., 1987); (Booker et al., 1994)    |
| <b>C</b>             | 466                       | 759                               | radical transfer             | (Lin et al., 1987); (Booker et al., 1994)    |
| RNR $\beta$ subunit  |                           |                                   |                              |                                              |
| <b>Residue</b>       | <b>Position in P-SSP7</b> | <b>Position in <i>E. coli</i></b> | <b>Function</b>              | <b>Citation</b>                              |
| <b>W</b>             | 14                        | 48                                | reduces dioxygen             | (Baldwin et al., 2000); (Krebs et al., 2000) |

|   |     |     |                           |                                                       |
|---|-----|-----|---------------------------|-------------------------------------------------------|
| Y | 78L | 122 | protein radical           | (Larsson and Sjöberg, 1986)                           |
| F | 122 | 208 | protein radical stability | (Ormö Mats, 1995)                                     |
| F | 127 | 212 | protein radical stability | (Ormö Mats, 1995)                                     |
| R | 145 | 236 | radical transport         | (Nordlund and Eklund, 1993);<br>(Eklund et al., 2001) |
| Y | 236 | 356 | radical transport         | (Climent et al., 1992);<br>(Rova et al., 1999)        |

---

924

925

926 **Table 4.** RNR Class I subclass membership of RNRdb groups.

| <b>Class I subclass</b> | <b>RNRdb groups</b>                                               |
|-------------------------|-------------------------------------------------------------------|
| Ia                      | NrdABe, NrdABg                                                    |
| Ia (presumed)*          | NrdABh, NrdABk, NrdAm,<br>NrdABn, NrdAq, some<br>NrdABz (NrdABza) |
| Ib                      | some NrdEF (NrdEFb)                                               |
| Ic                      | some NrdABz (NrdABzc)                                             |
| Id                      | NrdABi                                                            |
| Ie                      | some NrdEF (NrdEFe)                                               |

927 \*The Ia (presumed) subclass includes groups with no biochemically characterized members.

928

929 **Table 5.** Metal-binding amino acid residues in each of the  $\beta$  subunit references and P-SSP7.

| Organism              | Subclass | First Sphere |      |      |      |      |      | Second Sphere |      |
|-----------------------|----------|--------------|------|------|------|------|------|---------------|------|
|                       |          | 1            | 2    | 3    | 4    | 5    | 6    | 7             | 8    |
| <i>E. coli</i>        | Ia       | D85          | E116 | H119 | E205 | E239 | H242 | S115          | D238 |
| <i>S. typhimurium</i> | Ib       | D67          | E98  | H101 | E158 | E192 | H195 | M97           | D191 |
| <i>C. trachomatis</i> | Ic       | E89          | E120 | H123 | E193 | E227 | H230 | E119          | D226 |
| <i>F. johnsoniae</i>  | Id       | E67          | E97  | H100 | E160 | E195 | H198 | C96           | D194 |
| <i>A. urinae</i>      | Ie       | D85          | V116 | H119 | P176 | K210 | H213 | M115          | D209 |
| P-SSP7                | Cyano SP | E42          | E71  | H74  | E117 | E147 | H150 | D70           | D146 |

930

931

932 **Table 6.** Metal-binding amino acid residues in each of the RNRdb groups and the Cyano SP clade.  
 933 RNRdb groups are based on phylogenetic clades.

| Subclass         | Clade    | First Sphere |     |   |     |   |   | Second Sphere |     |
|------------------|----------|--------------|-----|---|-----|---|---|---------------|-----|
|                  |          | 1            | 2   | 3 | 4   | 5 | 6 | 7             | 8   |
| Ia               | NrdBe    | D            | E   | H | E   | E | H | M/I/V         | D   |
|                  | NrdBg    | D            | E   | H | E   | E | H | S             | D   |
|                  | NrdBh    | D            | E   | H | E   | E | H | E/Q           | D   |
| Ia<br>(presumed) | NrdBk    | D            | E   | H | E   | E | H | M/R/I         | D/E |
|                  | NrdBn    | D            | E   | H | E   | E | H | E             | D   |
|                  | NrdBza   | D            | E   | H | E   | E | H | E             | D   |
| Ib               | NrdFb    | D            | E   | H | E   | E | H | M             | D   |
| Ic               | NrdBzc   | E            | E   | H | E   | E | H | E             | D   |
| Id               | NrdBi    | E            | E   | H | E   | E | H | C/S           | D/E |
| Ie               | NrdFe    | D            | Q/V | H | S/P | K | H | M             | D   |
| If               | Cyano SP | E            | E   | H | E   | E | H | D             | D   |

934

935

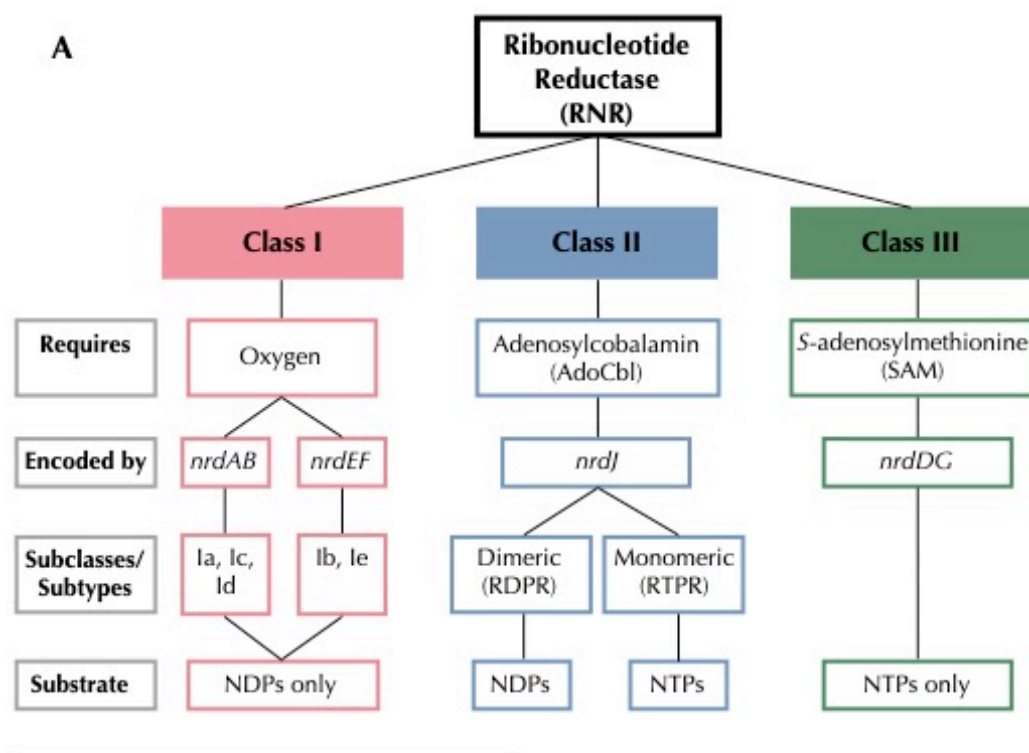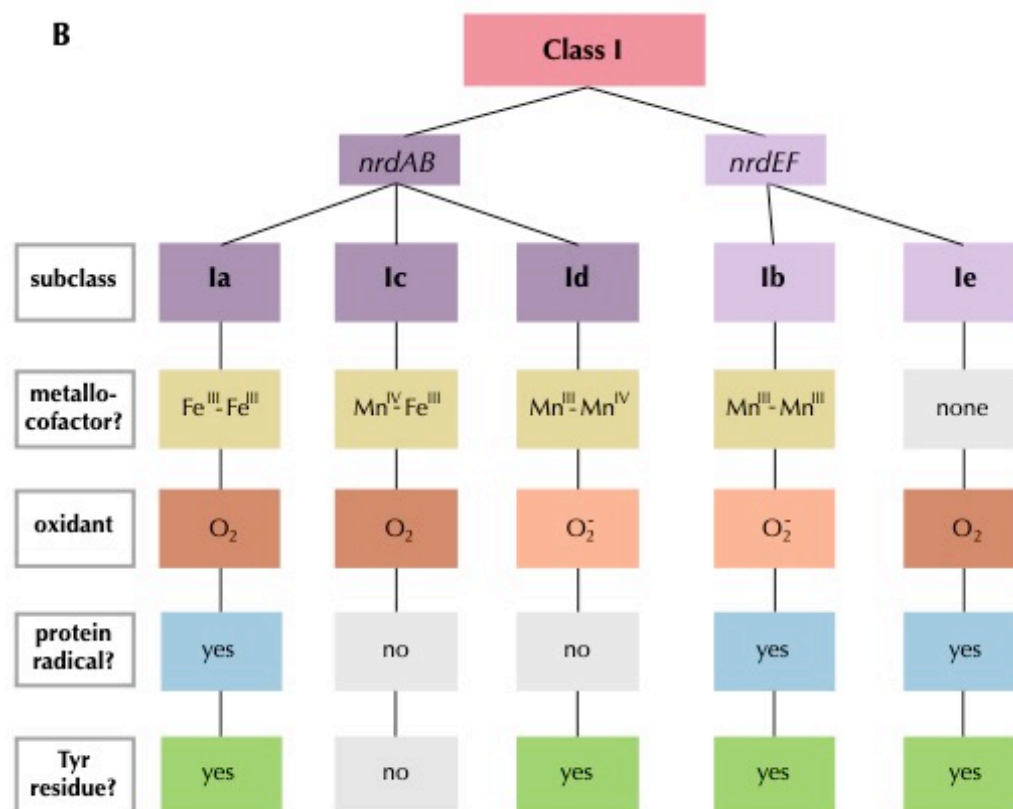

936

937 **Figure 1.** Summary of **A)** RNR class and **B)** Class I subclass divisions. Gray outlined boxes to the  
 938 left indicate categories. In B, like colors indicate common traits and light gray filled boxes indicate  
 939 missing traits.



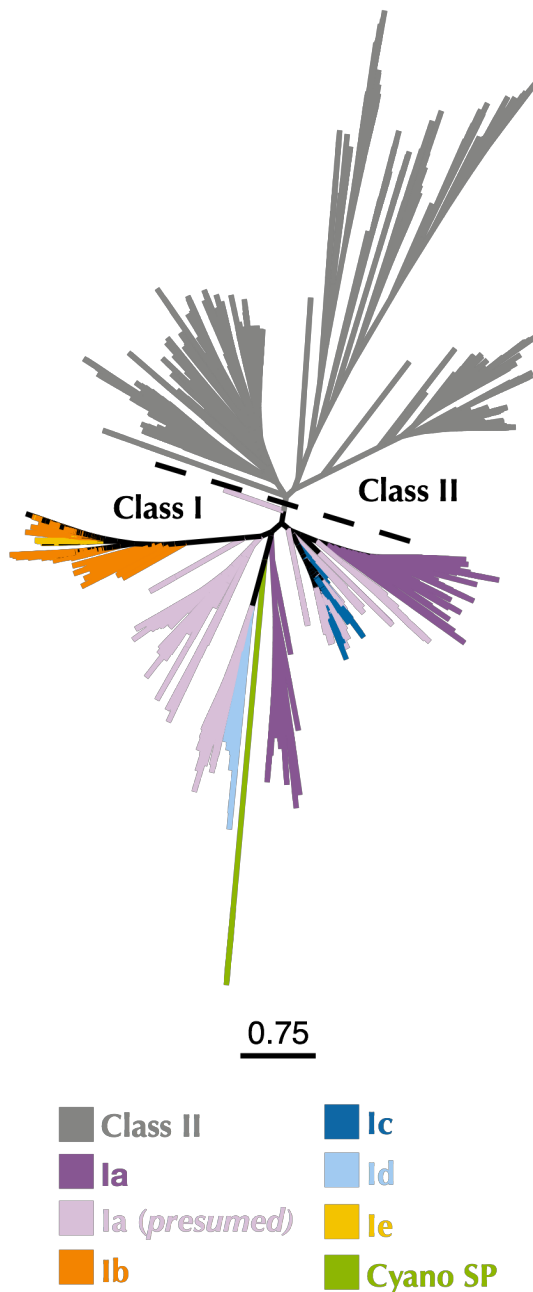

940

941 **Figure 2.** Maximum-likelihood phylogenetic tree of Cyano SP clade  $\alpha$  subunits with 80% clustered  
942 Class I  $\alpha$  and Class II RNRdb sequences trimmed to a region of interest. Gray branches belong to  
943 Class II. Colored branches belong to one of the five Class I subclasses, or Cyano SP as indicated in  
944 the key. Light purple branches indicate RNRdb groups without characterized members, which are  
945 assumed to be subclass Ia enzymes. Trees were constructed using FastTree and visualized and  
946 customized in Iroki. Scale bar represents amino acid changes per 100 positions.

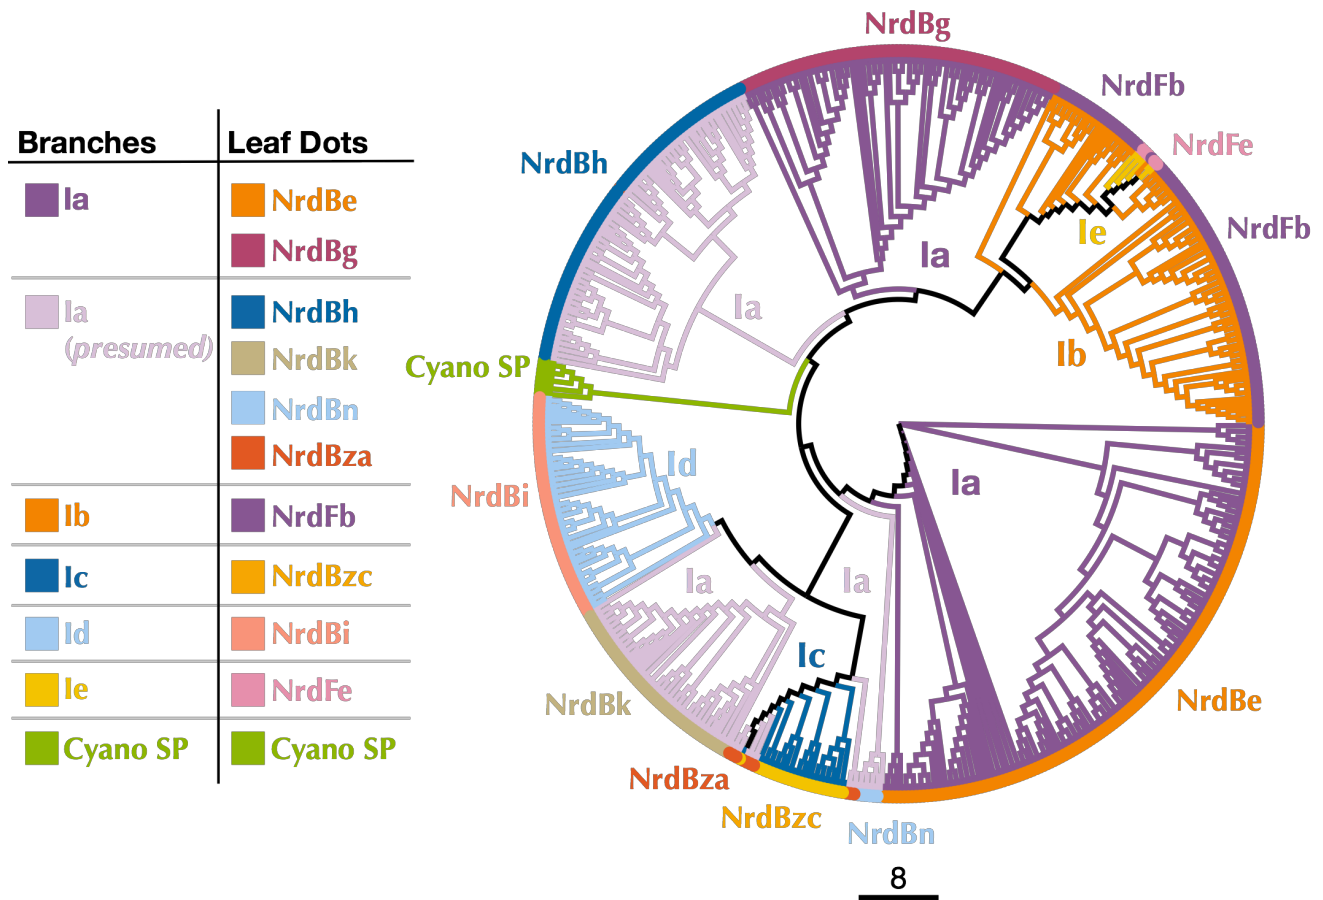

947  
 948 **Figure 3.** Cladogram of near full-length Cyano SP and 70% clustered RNRdb Class I  $\beta$  subunit  
 949 sequences. Branch colors indicate Class I subclass and leaf dot colors correspond to RNRdb group.  
 950 Trees were constructed using FastTree and visualized and customized in Iroki. Scale bar represents  
 951 amino acid changes per 100 positions.

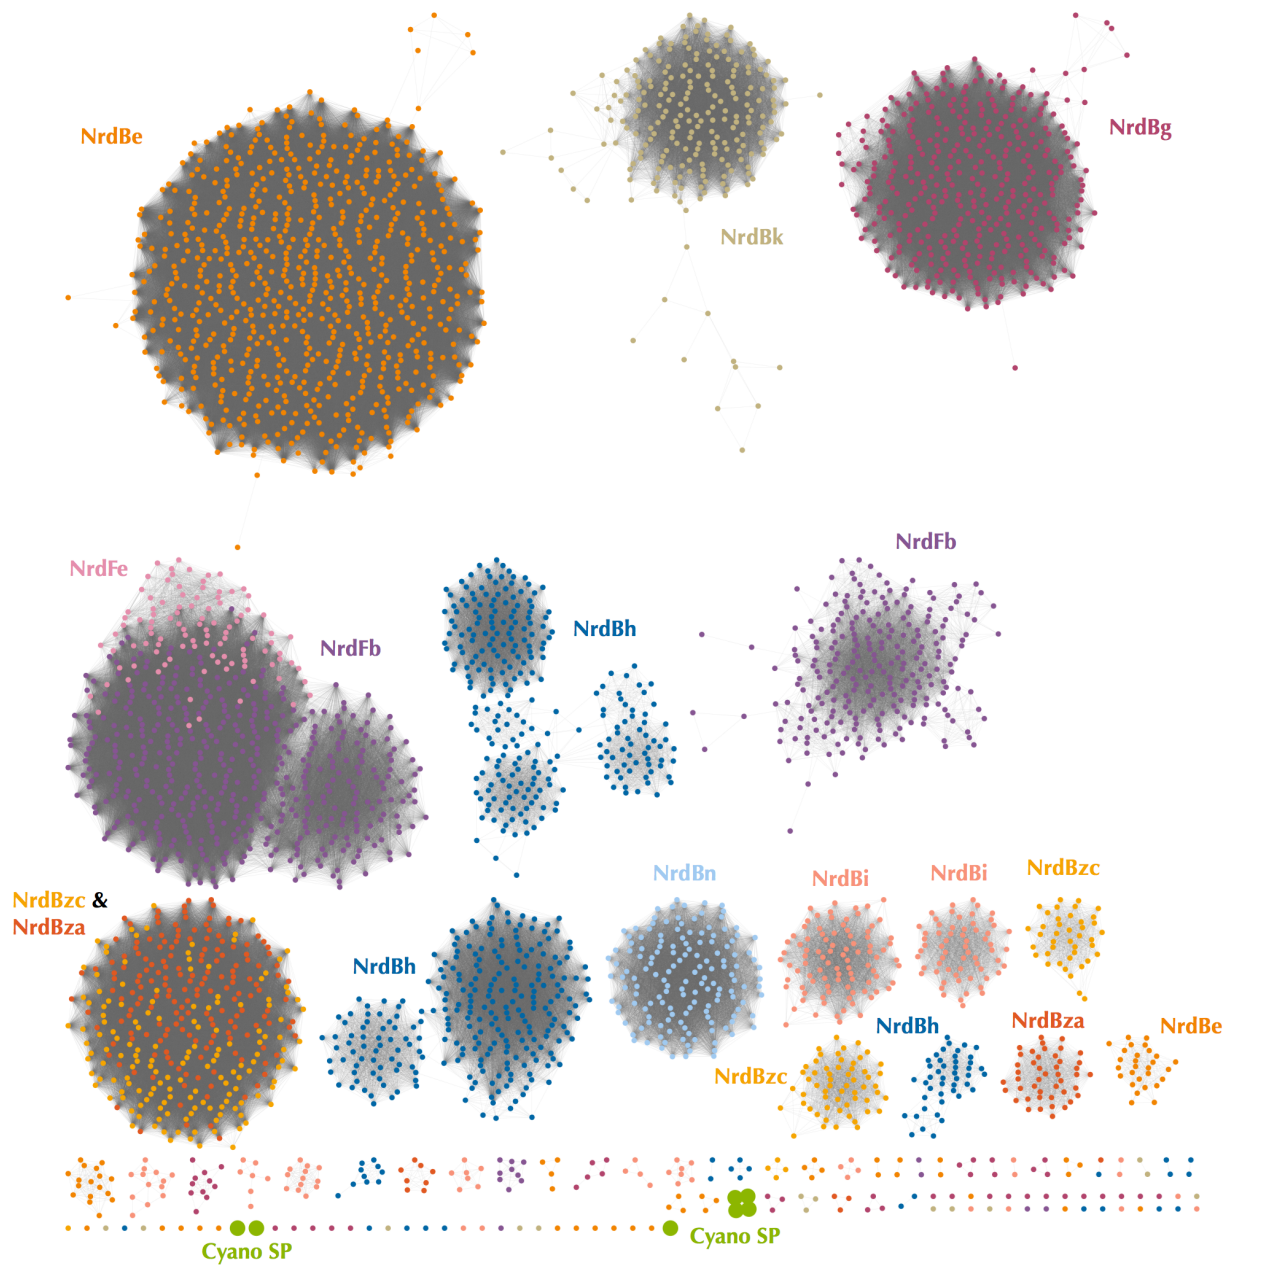

952  
 953 **Figure 4.** Protein sequence similarity network of the Cyano SP clade and all RNRdb Class I  $\beta$   
 954 subunit sequences included in phylogenetic analysis. Nodes represent sequence clusters  $\geq 90\%$   
 955 similarity. Nodes are colored based on RNRdb group and match leaf dot colors on the cladogram in  
 956 Fig. 3. Edges connect nodes with minimum alignment score  $\geq 90$ . Network was visualized and  
 957 customized in Cytoscape.

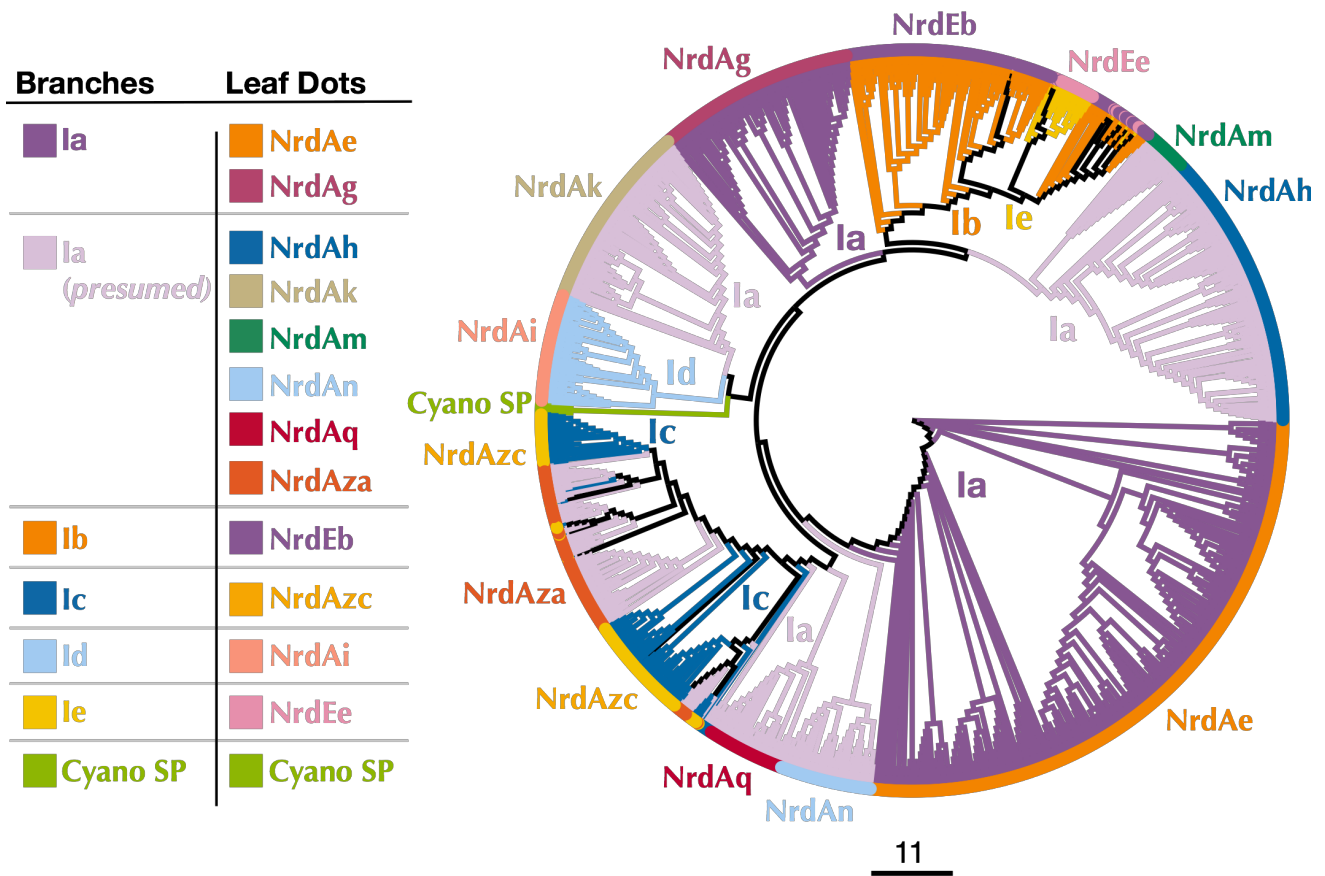

958

959 **Figure 5.** Cladogram of near full-length Cyano SP and RNRdb Class I  $\alpha$  subunit sequences clustered  
 960 at 80%. Branch colors indicate Class I subclass and leaf dot colors correspond to RNRdb group.  
 961 Colors matching to clades in Fig. 3 indicate  $\alpha/\beta$  subunit pairs. Note there are  $\alpha$  subunit clades that do  
 962 not have corresponding, distinct  $\beta$  subunit clades, as the  $\alpha$  subunits have diverged more than the  $\beta$   
 963 subunits. NrdAm  $\beta$  subunits belong to  $\beta$  subunit group NrdBh. NrdAq  $\beta$  subunits belong to  $\beta$   
 964 subunit subgroup NrdBza. Trees were constructed using FastTree and visualized and customized in  
 965 Iroki. Scale bar represents amino acid changes per 100 positions.

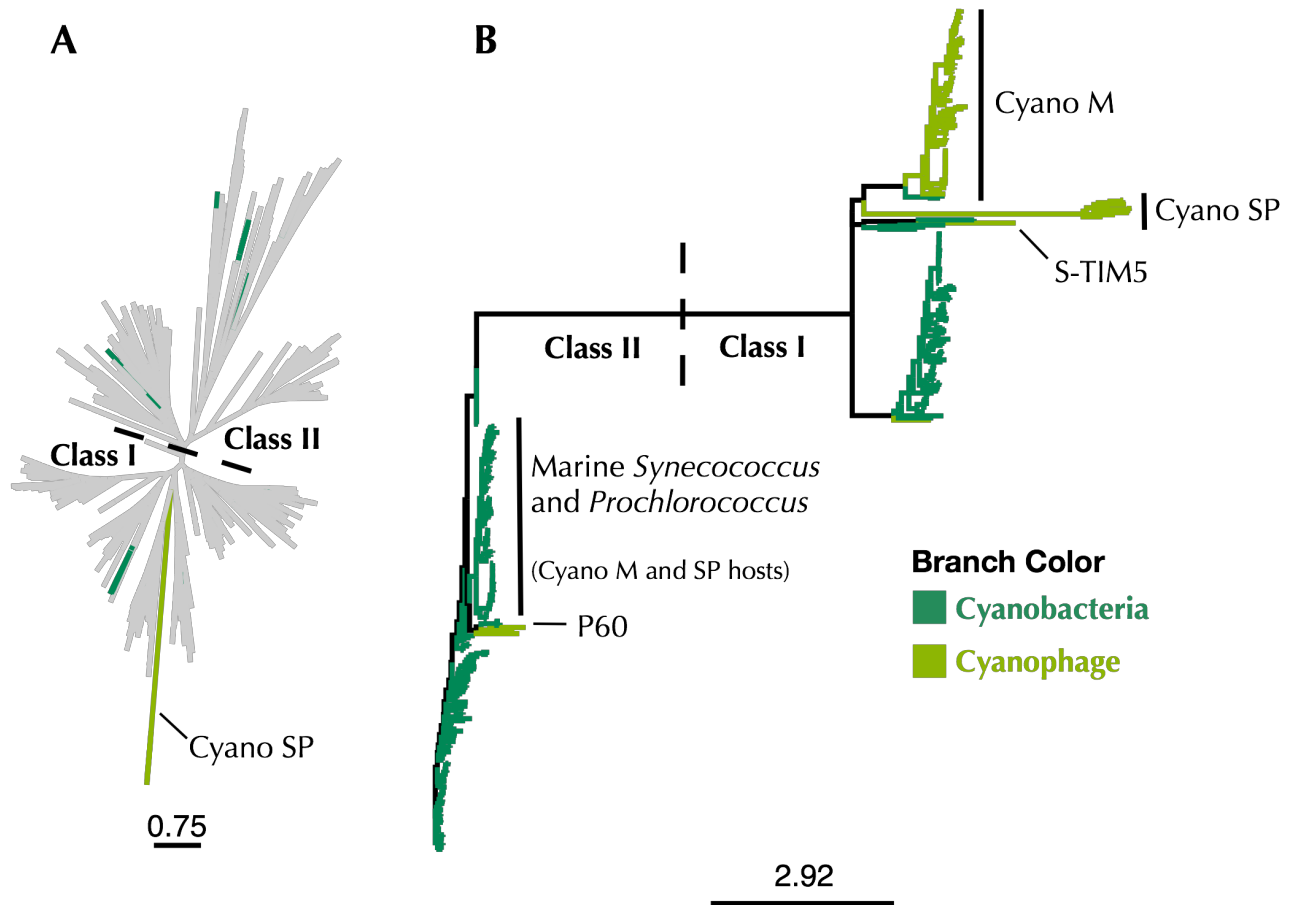

966

967 **Figure 6. A)** Maximum-likelihood phylogenetic tree of Cyano SP clade  $\alpha$  subunits with 80%  
 968 clustered Class I  $\alpha$  and Class II RNRdb sequences trimmed to a region of interest. **B)** Maximum-  
 969 likelihood phylogenetic tree of a subset of Class I  $\alpha$  subunit sequences limited to Cyanobacteria and  
 970 cyanophage. In both trees, dark green branches indicate Cyanobacteria and light green branches  
 971 indicate cyanophage. Trees were constructed using FastTree and visualized and customized in Iroki.  
 972 Scale bars represent amino acid changes per 100 positions.

973
